# Supplementary material for: Characterising the background incidence rates of adverse events of special interest for covid-19 vaccines in eight countries: multinational network cohort study
Source: PubMed Central journal article supplement (PMC8193077; doi:10.1136/bmj.n1435), 2021-06-14

Appendix tables for

**Characterizing the background incidence rates of adverse events of special interest for COVID-19 vaccines across eight countries: a multinational network cohort study**

AUTHORS: Xintong Li<sup>1\*</sup>, Anna Ostropolets<sup>2\*</sup>, Rupa Makadia<sup>3</sup>, Azza Shoaibi<sup>3</sup>, Gowtham Rao<sup>3</sup>, Anthony G. Sena<sup>3,6</sup>, Eugenia Martinez-Hernandez<sup>4</sup>, Antonella Delmestri<sup>1</sup>, Katia Verhamme<sup>6</sup>, Peter R Rijnbeek<sup>6</sup>, Talita Duarte-Salles<sup>5</sup>, Marc Suchard<sup>7,8</sup>, Patrick B Ryan<sup>2,3</sup>, George Hripcsak<sup>2</sup>, Daniel Prieto-Alhambra<sup>1,6</sup>

\*Joint first authors

AFFILIATIONS:

1. Centre for Statistics in Medicine, NDORMS, University of Oxford, Oxford, United Kingdom
2. Department of Biomedical Informatics, Columbia University Irving Medical Center, New York, NY, USA
3. Janssen Research and Development, Titusville, NJ, USA
4. Neurology Department, Hospital Clinic de Barcelona and University of Barcelona, Barcelona, Spain
5. Fundacio Institut Universitari per a la recerca a l'Atencio Primaria de Salut Jordi Gol i Gurina (IDIAPJGol), Barcelona, Spain
6. Department of Medical Informatics, Erasmus University Medical Center, Rotterdam, The Netherlands
7. Department of Biostatistics, Fielding School of Public Health, University of California, Los Angeles, Los Angeles, CA USA,
8. Department of Human Genetics, David Geffen School of Medicine at UCLA, University of California, Los Angeles, UCLA, Los Angeles, CA, USA

Corresponding author:

Prof Daniel Prieto-Alhambra

Botnar Research Centre, Windmill Road, OX37LD, Oxford, United Kingdom

[daniel.prietoalhambra@ndorms.ox.ac.uk](mailto:daniel.prietoalhambra@ndorms.ox.ac.uk)

**Content**

Appendix Table 1: database information

Appendix Table 2: adverse events of special interest phenotype definition and links

Appendix Table 3: source clinical codes used in phenotype definition

Appendix Table 4: age-sex specific crude incidence rates for each events of each database

Appendix Figure 1: database-specific incidence rates and meta-analytic pooled rates with 95% prediction intervals

**Appendix Table 1: database information**

| <b>Data source</b>                                                                         | <b>Short name</b>       | <b>Description</b>                                                                                                                                                                                                                                                                                                                                                                                                                                                                                                                                                                                                                                                                                                                                                                                                                                 |
|--------------------------------------------------------------------------------------------|-------------------------|----------------------------------------------------------------------------------------------------------------------------------------------------------------------------------------------------------------------------------------------------------------------------------------------------------------------------------------------------------------------------------------------------------------------------------------------------------------------------------------------------------------------------------------------------------------------------------------------------------------------------------------------------------------------------------------------------------------------------------------------------------------------------------------------------------------------------------------------------|
| IQVIA Australia Electronic Medical Records (Australia EMR)                                 | <b>IQVIA_AUSTRALIA</b>  | Anonymized patient records of more than 6 million patients in Australia collected from Patient Management software used by GPs during an office visit to document patients' clinical records.                                                                                                                                                                                                                                                                                                                                                                                                                                                                                                                                                                                                                                                      |
| IQVIA Longitudinal Patient Data France (LPD France)                                        | <b>IQVIA_FRANCE</b>     | Anonymized patient records of 7.8 million patients in France collected from Patient Management software used by GPs and select specialists during an office visit to document patients' clinical records                                                                                                                                                                                                                                                                                                                                                                                                                                                                                                                                                                                                                                           |
| IQVIA Disease Analyser Germany (DA Germany)                                                | <b>IQVIA_GERMANY</b>    | IQVIA DA Germany is collected from extracts of patient management software used by GPs and specialists practicing in ambulatory care settings. Data coverage includes more than 34M distinct person records out of a total population of 80M (42.5%) in the country and collected from 2,734 providers. Dates of service include from 1992 through March 2020.                                                                                                                                                                                                                                                                                                                                                                                                                                                                                     |
| Japan Medical Data Center (JMDC)                                                           | <b>JMDC_JAPAN</b>       | Japan Medical Data Center (JMDC) database consists of data from 60 society-managed health insurance plans covering workers aged 18 to 65 and their dependents (children younger than 18 years old and elderly people older than 65 years old). JMDC data includes membership status of the insured people and claims data provided by insurers under contract (e.g. patient-level demographic information, inpatient and outpatient data inclusive of diagnosis and procedures, and prescriptions as dispensed claims information).                                                                                                                                                                                                                                                                                                                |
| Integrated Primary Care Information (IPCI)                                                 | <b>IPCI_NETHERLANDS</b> | The Integrated Primary Care Information (IPCI) database is a Dutch database containing the medical records of more than 2.5 million patients provided by more than 600 GPs geographically spread over the Netherlands. In the Netherlands, all citizens are registered with a GP practice which acts as a gatekeeper in a two-way exchange of information with secondary care.                                                                                                                                                                                                                                                                                                                                                                                                                                                                     |
| Optum® De-Identified Clinformatics® Data Mart Database – Socio-Economic Status (Optum SES) | <b>OPTUM_SES_US</b>     | Optum® De-Identified Clinformatics® Data Mart Database is an adjudicated administrative health claims database for members with private health insurance, who are fully insured in commercial plans or Medicare Advantage. The population is primarily representative of US commercial claims patients (0-65 years old) with some Medicare (65+ years old) however ages are capped at 90 years. It includes data captured from administrative claims processed from inpatient and outpatient medical services and prescriptions as dispensed, as well as results for outpatient lab tests processed by large national lab vendors who participate in data exchange with Optum. Optum SES provides socio-economic status for members with both medical and pharmacy coverage and location information for patients at the US Census Division level. |

|                                                                                   |                     |                                                                                                                                                                                                                                                                                                                                                                                                                                                                                                                                                                                                                                                                                                                                                                                                                                                                                                                                                                                                                                                                        |
|-----------------------------------------------------------------------------------|---------------------|------------------------------------------------------------------------------------------------------------------------------------------------------------------------------------------------------------------------------------------------------------------------------------------------------------------------------------------------------------------------------------------------------------------------------------------------------------------------------------------------------------------------------------------------------------------------------------------------------------------------------------------------------------------------------------------------------------------------------------------------------------------------------------------------------------------------------------------------------------------------------------------------------------------------------------------------------------------------------------------------------------------------------------------------------------------------|
| Optum® de-identified Electronic Health Record Dataset (Optum EHR)                 | <b>OPTUM_EHR_US</b> | Optum® de-identified Electronic Health Record Dataset is derived from dozens of healthcare provider organizations in the United States (that include more than 700 hospitals and 7,000 Clinics treating more than 103 million patients) receiving care in the United States. The medical record data includes clinical information, inclusive of prescriptions as prescribed and administered, lab results, vital signs, body measurements, diagnoses, procedures, and information derived from clinical Notes using Natural Language Processing (NLP).                                                                                                                                                                                                                                                                                                                                                                                                                                                                                                                |
| IBM MarketScan Medicare Supplemental and Coordination of Benefits Database (MDCR) | <b>MDCR_US</b>      | IBM MarketScan Medicare Supplemental and Coordination of Benefits Database (MDCR) represents health services of retirees in the United States with primary or Medicare supplemental coverage through privately insured fee-for-service, point-of-service, or capitated health plans. These data include adjudicated health insurance claims (e.g. inpatient, outpatient, and outpatient pharmacy). Additionally, it captures laboratory tests for a subset of the covered lives.                                                                                                                                                                                                                                                                                                                                                                                                                                                                                                                                                                                       |
| IBM MarketScan Multi-State Medicaid Database (MDCD)                               | <b>MDCD_US</b>      | IBM MarketScan Multi-State Medicaid Database (MDCD) contains adjudicated US health insurance claims for Medicaid enrollees from multiple states and includes hospital discharge diagnoses, outpatient diagnoses and procedures, and outpatient pharmacy claims as well as ethnicity and Medicare eligibility. Members maintain their same identifier even if they leave the system for a brief period; however the dataset lacks lab data.                                                                                                                                                                                                                                                                                                                                                                                                                                                                                                                                                                                                                             |
| IBM MarketScan Commercial Claims and Encounters Database (CCAE)                   | <b>CCAE_US</b>      | IBM MarketScan Commercial Claims and Encounters Database (CCAE) is a US employer-based private-payer administrative claims database. The data include adjudicated health insurance claims (e.g. inpatient, outpatient, and outpatient pharmacy) as well as enrollment data from large employers and health plans who provide private healthcare coverage to employees, their spouses, and dependents. Additionally, it captures laboratory tests for a subset of the covered lives. This administrative claims database includes a variety of fee-for-service, preferred provider organizations, and capitated health plans.                                                                                                                                                                                                                                                                                                                                                                                                                                           |
| Clinical Practice Research Datalink (CPRD)                                        | <b>CPRD_GOLD_UK</b> | The Clinical Practice Research Datalink (CPRD) is a governmental, not-for-profit research service, jointly funded by the NHS National Institute for Health Research (NIHR) and the Medicines and Healthcare products Regulatory Agency (MHRA), a part of the Department of Health, United Kingdom (UK). CPRD consists of data collected from UK primary care for all ages. This includes conditions, observations, measurements, and procedures that the general practitioner is made aware of in addition to any prescriptions as prescribed by the general practitioner. In addition to primary care, there are also linked secondary care records for a small number of people. The major data elements contained within this database are outpatient prescriptions given by the general practitioner (coded with Multilex codes) and outpatient clinical, referral, immunization or test events that the general practitioner knows about (coded in Read or ICD10 or LOINC codes). The database also contains the patients' year of births and any date of deaths. |

|                                                                                          |                       |                                                                                                                                                                                                                                                                                                                                                                                                                                                                                                                                                                                                                         |
|------------------------------------------------------------------------------------------|-----------------------|-------------------------------------------------------------------------------------------------------------------------------------------------------------------------------------------------------------------------------------------------------------------------------------------------------------------------------------------------------------------------------------------------------------------------------------------------------------------------------------------------------------------------------------------------------------------------------------------------------------------------|
| Columbia University Irving Medical Center (CUIMC)                                        | <b>CUMC_US</b>        | The clinical data warehouse of NewYork-Presbyterian Hospital/Columbia University Irving Medical Center, New York, NY, based on its current and previous electronic health record systems, with data spanning over 30 years and including over 6 million patients                                                                                                                                                                                                                                                                                                                                                        |
| Information System for Research in Primary Care – Hospitalization Linked Data (SIDIAP-H) | <b>SIDIAP_H_SPAIN</b> | The Information System for Research in Primary Care (SIDIAP; <a href="http://www.sidiap.org">www.sidiap.org</a> ) is a primary care records database from Catalonia, North-East Spain. The SIDIAP-H subset of the database includes around 2 million people out of the total 7 million in SIDIAP that are registered in primary care practices with linked hospital inpatient data available as obtained from the Catalan Institute of Health hospitals. Healthcare is universal and tax-payer funded in the region, and primary care physicians are gatekeepers for all care and responsible for repeat prescriptions. |

**Appendix Table 2: adverse events of special interest phenotype definition and links**

| Phenotype name                         | AESI Target Cohort ID (name and clean period)      | Link to ATLAS cohort                                                                                        | Link to package SQL                                                                                                                                                                                                                                                                                                   |
|----------------------------------------|----------------------------------------------------|-------------------------------------------------------------------------------------------------------------|-----------------------------------------------------------------------------------------------------------------------------------------------------------------------------------------------------------------------------------------------------------------------------------------------------------------------|
| Acute myocardial infarction IP         | 312: Acute myocardial infarction IP (365d)         | <a href="https://atlas.ohdsi.org/#/cohortdefinition/340">https://atlas.ohdsi.org/#/cohortdefinition/340</a> | <a href="https://github.com/ohdsi-studies/Covid19VaccineAesiIncidenceCharacterization/blob/master/inst/sql/sql_server/outcome/AMI_IP.sql">https://github.com/ohdsi-studies/Covid19VaccineAesiIncidenceCharacterization/blob/master/inst/sql/sql_server/outcome/AMI_IP.sql</a>                                         |
| Anaphylaxis                            | 303: Anaphylaxis (30d)                             | <a href="https://atlas.ohdsi.org/#/cohortdefinition/349">https://atlas.ohdsi.org/#/cohortdefinition/349</a> | <a href="https://github.com/ohdsi-studies/Covid19VaccineAesiIncidenceCharacterization/blob/master/inst/sql/sql_server/outcome/Anaphylaxis.sql">https://github.com/ohdsi-studies/Covid19VaccineAesiIncidenceCharacterization/blob/master/inst/sql/sql_server/outcome/Anaphylaxis.sql</a>                               |
| Appendicitis                           | 323: Appendicitis (365d)                           | <a href="https://atlas.ohdsi.org/#/cohortdefinition/386">https://atlas.ohdsi.org/#/cohortdefinition/386</a> | <a href="https://github.com/ohdsi-studies/Covid19VaccineAesiIncidenceCharacterization/blob/master/inst/sql/sql_server/outcome/Appendicitis.sql">https://github.com/ohdsi-studies/Covid19VaccineAesiIncidenceCharacterization/blob/master/inst/sql/sql_server/outcome/Appendicitis.sql</a>                             |
| Bells palsy                            | 307: Bells palsy (183d)                            | <a href="https://atlas.ohdsi.org/#/cohortdefinition/347">https://atlas.ohdsi.org/#/cohortdefinition/347</a> | <a href="https://github.com/ohdsi-studies/Covid19VaccineAesiIncidenceCharacterization/blob/master/inst/sql/sql_server/outcome/BellsPalsy.sql">https://github.com/ohdsi-studies/Covid19VaccineAesiIncidenceCharacterization/blob/master/inst/sql/sql_server/outcome/BellsPalsy.sql</a>                                 |
| Deep vein thrombosis                   | 332: Deep vein thrombosis coverICD (365d)          | <a href="https://atlas.ohdsi.org/#/cohortdefinition/402">https://atlas.ohdsi.org/#/cohortdefinition/402</a> | <a href="https://github.com/ohdsi-studies/Covid19VaccineAesiIncidenceCharacterization/blob/master/inst/sql/sql_server/outcome/DVT_coverICD.sql">https://github.com/ohdsi-studies/Covid19VaccineAesiIncidenceCharacterization/blob/master/inst/sql/sql_server/outcome/DVT_coverICD.sql</a>                             |
| Disseminated intravascular coagulation | 321: Disseminated intravascular coagulation (365d) | <a href="https://atlas.ohdsi.org/#/cohortdefinition/385">https://atlas.ohdsi.org/#/cohortdefinition/385</a> | <a href="https://github.com/ohdsi-studies/Covid19VaccineAesiIncidenceCharacterization/blob/master/inst/sql/sql_server/outcome/DisIntraCoag.sql">https://github.com/ohdsi-studies/Covid19VaccineAesiIncidenceCharacterization/blob/master/inst/sql/sql_server/outcome/DisIntraCoag.sql</a>                             |
| Encephalomyelitis IP                   | 308: Encephalomyelitis IP (183d)                   | <a href="https://atlas.ohdsi.org/#/cohortdefinition/346">https://atlas.ohdsi.org/#/cohortdefinition/346</a> | <a href="https://github.com/ohdsi-studies/Covid19VaccineAesiIncidenceCharacterization/blob/master/inst/sql/sql_server/outcome/Encephalomyelitis%20IP.sql">https://github.com/ohdsi-studies/Covid19VaccineAesiIncidenceCharacterization/blob/master/inst/sql/sql_server/outcome/Encephalomyelitis%20IP.sql</a>         |
| Guillian-Barre syndrome IP             | 305: Guillian-Barre syndrome IP (365d)             | <a href="https://atlas.ohdsi.org/#/cohortdefinition/343">https://atlas.ohdsi.org/#/cohortdefinition/343</a> | <a href="https://github.com/ohdsi-studies/Covid19VaccineAesiIncidenceCharacterization/blob/master/inst/sql/sql_server/outcome/GuillainBarreSyndrome%20IP.sql">https://github.com/ohdsi-studies/Covid19VaccineAesiIncidenceCharacterization/blob/master/inst/sql/sql_server/outcome/GuillainBarreSyndrome%20IP.sql</a> |
| Hemorrhagic stroke IP                  | 324: Hemorrhagic stroke IP (365d)                  | <a href="https://atlas.ohdsi.org/#/cohortdefinition/405">https://atlas.ohdsi.org/#/cohortdefinition/405</a> | <a href="https://github.com/ohdsi-studies/Covid19VaccineAesiIncidenceCharacterization/blob/master/inst/sql/sql_server/outcome/HemorrhagicStroke%20IP.sql">https://github.com/ohdsi-studies/Covid19VaccineAesiIncidenceCharacterization/blob/master/inst/sql/sql_server/outcome/HemorrhagicStroke%20IP.sql</a>         |
| Immune thrombocytopenia                | 326: Immune thrombocytopenia (365d)                | <a href="https://atlas.ohdsi.org/#/cohortdefinition/335">https://atlas.ohdsi.org/#/cohortdefinition/335</a> | <a href="https://github.com/ohdsi-studies/Covid19VaccineAesiIncidenceCharacterization/blob/master/inst/sql/sql_server/outcome/ImmuneThrombocytopenia.sql">https://github.com/ohdsi-studies/Covid19VaccineAesiIncidenceCharacterization/blob/master/inst/sql/sql_server/outcome/ImmuneThrombocytopenia.sql</a>         |
| Myocarditis pericarditis               | 314: Myocarditis pericarditis (365d)               | <a href="https://atlas.ohdsi.org/#/cohortdefinition/339">https://atlas.ohdsi.org/#/cohortdefinition/339</a> | <a href="https://github.com/ohdsi-studies/Covid19VaccineAesiIncidenceCharacterization/blob/master/inst/sql/sql_server/outcome/MyocarditisPericarditis.sql">https://github.com/ohdsi-studies/Covid19VaccineAesiIncidenceCharacterization/blob/master/inst/sql/sql_server/outcome/MyocarditisPericarditis.sql</a>       |
| Narcolepsy                             | 319: Narcolepsy (365d)                             | <a href="https://atlas.ohdsi.org/#/cohortdefinition/345">https://atlas.ohdsi.org/#/cohortdefinition/345</a> | <a href="https://github.com/ohdsi-studies/Covid19VaccineAesiIncidenceCharacterization/blob/master/inst/sql/sql_server/outcome/Narcolepsy.sql">https://github.com/ohdsi-studies/Covid19VaccineAesiIncidenceCharacterization/blob/master/inst/sql/sql_server/outcome/Narcolepsy.sql</a>                                 |
| Non-hemorrhagic stroke IP              | 310: Non-hemorrhagic stroke IP (365d)              | <a href="https://atlas.ohdsi.org/#/cohortdefinition/406">https://atlas.ohdsi.org/#/cohortdefinition/406</a> | <a href="https://github.com/ohdsi-studies/Covid19VaccineAesiIncidenceCharacterization/blob/master/inst/sql/sql_server/outcome/NonHemorrhagicStroke%20IP.sql">https://github.com/ohdsi-studies/Covid19VaccineAesiIncidenceCharacterization/blob/master/inst/sql/sql_server/outcome/NonHemorrhagicStroke%20IP.sql</a>   |

|                     |                                 |                                                                                                             |                                                                                                                                                                                                                                                                                                       |
|---------------------|---------------------------------|-------------------------------------------------------------------------------------------------------------|-------------------------------------------------------------------------------------------------------------------------------------------------------------------------------------------------------------------------------------------------------------------------------------------------------|
| Pulmonary embolism  | 316: Pulmonary embolism (365d)  | <a href="https://atlas.ohdsi.org/#/cohortdefinition/411">https://atlas.ohdsi.org/#/cohortdefinition/411</a> | <a href="https://github.com/ohdsi-studies/Covid19VaccineAesiIncidenceCharacterization/blob/master/inst/sql/sql_server/outcome/PulmonaryEmbolism.sql">https://github.com/ohdsi-studies/Covid19VaccineAesiIncidenceCharacterization/blob/master/inst/sql/sql_server/outcome/PulmonaryEmbolism.sql</a>   |
| Transverse myelitis | 318: Transverse myelitis (365d) | <a href="https://atlas.ohdsi.org/#/cohortdefinition/381">https://atlas.ohdsi.org/#/cohortdefinition/381</a> | <a href="https://github.com/ohdsi-studies/Covid19VaccineAesiIncidenceCharacterization/blob/master/inst/sql/sql_server/outcome/TransverseMyelitis.sql">https://github.com/ohdsi-studies/Covid19VaccineAesiIncidenceCharacterization/blob/master/inst/sql/sql_server/outcome/TransverseMyelitis.sql</a> |

**Appendix Table 3: source clinical codes used in phenotype definition**

| Phenotype name                 | ICD10CM                                                                                                                                                                                                                                                                                                                                                                                                                                                                                                                                                                                                                                                                                     | ICD9CM                                                                                                                                                                                                                                                              | ICPC-1 | KCD7                                                                                              | OXMIS                          | Read                                                                                                                                                                                                                                                                                                                                                                                                             |
|--------------------------------|---------------------------------------------------------------------------------------------------------------------------------------------------------------------------------------------------------------------------------------------------------------------------------------------------------------------------------------------------------------------------------------------------------------------------------------------------------------------------------------------------------------------------------------------------------------------------------------------------------------------------------------------------------------------------------------------|---------------------------------------------------------------------------------------------------------------------------------------------------------------------------------------------------------------------------------------------------------------------|--------|---------------------------------------------------------------------------------------------------|--------------------------------|------------------------------------------------------------------------------------------------------------------------------------------------------------------------------------------------------------------------------------------------------------------------------------------------------------------------------------------------------------------------------------------------------------------|
| Acute myocardial infarction IP | I21.9,I21.A,I21.A1,I21.A9,I21,I21.0,I21.1,I21.2,I22,I23,I21.3,I21.4,I22.0,I22.1,I22.8,I22.9,I23.0,I23.1,I23.3,I23.4,I23.6,I23.8,I21.11,I21.29,I21.01,I21.02,I21.21,I21.09,I21.19,I22.2,                                                                                                                                                                                                                                                                                                                                                                                                                                                                                                     | 410.12,410.2,410.2,410.21,410.7,410.9,410,410.02,410.22,410.32,410.92,410.01,410,410.4,410.71,410.91,410.3,410.8,410.11,410.6,410.72,410.5,410.1,410.62,410,410.3,410.4,410.5,410.82,410.31,410.1,410.4,410.51,410.52,410.6,410.8,410.81,410.41,410.7,410.9,410.61, | K75.00 | I21,I21.0,I21.1,I21.2,I21.3,I21.4,I21.9,I22,I22.0,I22.1,I22.8,I22.9,I23.0,I23.1,I23.3,I23.4,I23.6 | 4109NH,4109N,4109              | G30..00,G304.00,G307000,G30B.00,G380.00,G384.00,G301000,G382.00,G303.00,G307100,G30..13,G30..15,G30..17,G305.00,G364.00,G38z.00,G308.00,G30y200,G30y.00,G351.00,Gyu3600,G353.00,G306.00,G366.00,G30y000,G30..14,G381.00,G30yz00,G30z.00,G35..00,G302.00,G38..00,G30X.00,G383.00,Gyu3500,G31y100,G30..11,G300.00,G301100,G307.00,G301z00,G309.00,G350.00,Gyu3400,G35X.00,G361.00,G301.00,G30X000,G360.00,G363.00, |
| Anaphylaxis                    | T78.2,T80.52,T80.59,T80.5,T80.52XA,T78.2XXA,T80.59XD,T78.2XXD,T80.52XD,T80.59XA,                                                                                                                                                                                                                                                                                                                                                                                                                                                                                                                                                                                                            | 999.4,999.42,995,999.49                                                                                                                                                                                                                                             | A12.01 | T78.2,T80.5                                                                                       |                                | SP34.00,SN50.00,SN50.11                                                                                                                                                                                                                                                                                                                                                                                          |
| Appendicitis                   | K35.2,K35.3,K35,K35.8,K35.20,K35.21,K35.30,K35.31,K35.32,K35.33,K35.890,K35.891,K36,K37,K35.80,K35.89,                                                                                                                                                                                                                                                                                                                                                                                                                                                                                                                                                                                      | 540.9,542,540,540.1,541                                                                                                                                                                                                                                             |        | K35,K35.2,K35.3,K35.8,K36,K37,                                                                    | 5409B,542R,5409,542 C,542G,541 | A05y000,J20z100,J201.11,J20..00,J200.00,J222.00,J220.00,J22z.00,J201.12,J202.00,J221.00,J223.00,J20z.00,J21..00,J22..00,J203.00,Jyu2000,J201.00,J204.00                                                                                                                                                                                                                                                          |
| Bells palsy                    | G51.0                                                                                                                                                                                                                                                                                                                                                                                                                                                                                                                                                                                                                                                                                       | 351                                                                                                                                                                                                                                                                 | N91.00 | G51.0                                                                                             |                                | F310.00,2BR9.00                                                                                                                                                                                                                                                                                                                                                                                                  |
| Deep vein thrombosis           | I82.50,I80.21,I82.21,I82.22,I82.4,I82.41,I82.42,I82.43,I82.44,I82.49,I82.4Y,I82.4Z,I82.5,I82.59,I82.5Y,I82.62,I82.A,I82.A1,I82.B,I82.B1,I82.C,I82.C1,I82.2,I82.3,I82.40,I82.81,I82.413,I82.439,I82.491,I82.591,I82.819,I82.C11,I82.210,I82.211,I82.402,I82.422,I82.499,I82.622,I82.401,I82.592,I82.623,I82.811,I82.A13,I82.421,I82.629,I82.432,I82.442,I80.219,I82.4Z1,I82.A19,I82.220,I82.431,I82.449,I82.B12,I82.409,I82.493,I82.501,I82.509,I82.5Y1,I82.812,I82.B11,I82.4Y2,I82.4Z2,I82.503,I82.599,I82.A11,I82.403,I82.4Y3,I82.5Y9,I82.B13,I82.411,I82.443,I82.5Y2,I82.412,I82.4Z9,I82.502,I82.593,I82.B19,I82.C12,I82.429,I82.433,I82.441,I82.492,I82.A12,I82.C13,I82.221,I82.4Y1,I82. | 453.42,453.86,451.81,453.4,453.2,453.84,453.85,453.3,453.41,453.4,453.83,453.9,453.82,453.89,                                                                                                                                                                       | K94.01 | I82.2,I82.3                                                                                       | 453 A,453L,4510A,453 CT        | G802000,G823.00,J420y00,L414.12,G801700,G80y600,SP12200,J420.18,G801600,G801B00,G801.12,G801.13,G801A00,G826.00,G801D00,G80y500,G801800,G82z100,G801C00,G80y700,G801F00,J420200,G801.11,G80y400,G822.00,G825.00,G801H00,G801J00,                                                                                                                                                                                 |

|                                        |                                                                                                                                                                                                                                   |                                                                                                                                                                                                 |               |                                                                                                                                      |                                                                                                   |                                                                                                                                                                                                                                                                                                                                                                                                                                                                                                                                                                  |
|----------------------------------------|-----------------------------------------------------------------------------------------------------------------------------------------------------------------------------------------------------------------------------------|-------------------------------------------------------------------------------------------------------------------------------------------------------------------------------------------------|---------------|--------------------------------------------------------------------------------------------------------------------------------------|---------------------------------------------------------------------------------------------------|------------------------------------------------------------------------------------------------------------------------------------------------------------------------------------------------------------------------------------------------------------------------------------------------------------------------------------------------------------------------------------------------------------------------------------------------------------------------------------------------------------------------------------------------------------------|
|                                        | 621,I82.419,I82.423,I82.4Y9,I82.4Z3,I82.5Y3,I82.813,I82.C19,                                                                                                                                                                      |                                                                                                                                                                                                 |               |                                                                                                                                      |                                                                                                   |                                                                                                                                                                                                                                                                                                                                                                                                                                                                                                                                                                  |
| Disseminated intravascular coagulation | D65,P60                                                                                                                                                                                                                           | 286.6,776.2                                                                                                                                                                                     |               | D65,P60                                                                                                                              | 2870FL                                                                                            | D306.12,Q452.00,D306.00,L091100                                                                                                                                                                                                                                                                                                                                                                                                                                                                                                                                  |
| Encephalomyelitis IP                   | G04,G04.0,G04.3,G04.8,G04.9,G05,B05.0,G07,G36.1,G04.00,G05.4,G04.31,G04.39,G04.01,G04.90,G04.30,G04.81,G05.3,G04.02,G04.32,G04.89,G04.91,                                                                                         | 55,323.1,56.01,323,323.63,323.9,323.41,323.01,323.61,323.71,323.4,323.62,323.81,323.5,323.82,323.42,323.51,323.6,323.7,323.8,52,323.2,323.72,323,                                               | N71.03,N71.04 | A32.1,B01.1,B05.0,G04,G04.0,G04.8,G04.9,G05,G05.0,G05.1,G05.2,G05.8,G07,G36.1                                                        | 323 M,9991A,323 A,323 EN                                                                          | F034C00,A560100,F03..00,F034F00,F035.00,F03y.11,F034300,F034600,F03X.00,F034000,F03z.00,Fyu0500,F034B00,F034J00,F035000,F0...00,Fyu0.00,F034y00,F034500,Fyu0600,F034x00,F034800,F034900,F034z00,F034E00,F035011,F03y.00,Fyu0A00,F034.00,F034700,F03..11,F034200,F03z.11,F034A00,F034D00,F035100,A520.00,F034H00,F03..12,F0y..00,F034G00,F035z00,F212.00,F034100,F0z..00,Fyu0900,A550.00,F034400,                                                                                                                                                                 |
| Guillian-Barre syndrome IP             | G61.0                                                                                                                                                                                                                             | 357                                                                                                                                                                                             | N94.01        | G61.0                                                                                                                                | 354 GB                                                                                            | F370200,F370000,F370z00,F370.00                                                                                                                                                                                                                                                                                                                                                                                                                                                                                                                                  |
| Hemorrhagic stroke IP                  | I60,I60.1,I60.2,I60.3,I60.5,I61,I62,I62.0,I60.4,I60.6,I60.7,I60.8,I60.9,I61.0,I61.1,I61.3,I61.5,I61.6,I61.8,I61.9,I62.9,I60.12,I60.10,I60.30,I60.31,I62.00,I60.52,I60.11,I62.01,I60.21,I60.32,I60.51,I60.50,I60.20,I60.22,I62.02, | 430,432.9,432                                                                                                                                                                                   | K90.01        | I60,I60.1,I60.2,I60.3,I60.4,I60.6,I60.7,I60.8,I60.9,I61.8,I61.9,I62.9,                                                               | 4309,4319CR                                                                                       | G62z.00,G621.00,Gyu6000,G603.00,G622.00,G602.00,G60X.00,Gyu6100,G604.00,G60z.00,Gyu6E00,G60..00,                                                                                                                                                                                                                                                                                                                                                                                                                                                                 |
| Immune thrombocytopenia                | D69.3,D75.82,D69.41,D69.42,D69.51                                                                                                                                                                                                 | 289.84,287.32,287.33,287.31,287.41                                                                                                                                                              | B83.02        | D69.3                                                                                                                                | 2870B,4464TH                                                                                      | D313.13,D314000,D313y00,G756000,D313011,D313100,D313.12,D313012,D313.14,D314300,G756100,42P2.11,D313.15,D313111,D313000,D313.11,                                                                                                                                                                                                                                                                                                                                                                                                                                 |
| Myocarditis pericarditis               | I30,I40,I01.0,I01.2,I09.0,I09.2,I24.1,I30.0,I30.1,I30.8,I30.9,I31.0,I31.1,I32,I40.0,I40.1,I40.8,I40.9,I41,I51.4,I97.0,D86.85,I11.82,A39.52,B26.82,A39.53,B33.23,B33.22,I10.82,M32.12,A38.1,B58.81,                                | 115.13,391.2,422.99,36.43,393,422,74.21,74.23,398,420.9,422,422.91,422.92,423.1,115.03,422.93,423.2,93.81,93.82,115.93,32.82,420.91,422.9,98.83,420,36.41,422.9,130.3,420.9,420.99,391,420,429, |               | I40,I01.0,I01.2,I09.0,I09.2,I30,I30.0,I30.1,I30.8,I30.9,I31.0,I31.1,I32.8,I40.0,I40.1,I40.8,I40.9,I41,I41.2,I41.8,I51.4,I97.0,I32.1, | 0742M,423 A,0742P,3912,3912N,393 R,420 BB,420,428 B,423 AH,3910AN,3910,423 CM,420 BP,420 NF,9971, | G501.00,G520200,G52y200,Gyu5J00,G5y7.00,G50z300,G520000,G520600,G500100,G500400,A742300,G500200,G5y4000,G52y700,G5y8.00,G51z200,G52y000,G532z00,Gyu5H00,AB41300,G52y500,G5y0.00,G1y0.00,G50z400,G50z500,G520300,G52y.00,G532.00,Gyu5L00,A32y100,A364100,G520700,G52y600,Gyu5400,AD03.00,G500300,G50zz00,G52y100,G52y111,Gyu5F00,G012.00,G102.00,A17y100,G50z511,G10..00,G500500,G532100,G50z111,G52z.00,G531z00,AB40300,G50z.00,N000400,G50z200,G531.00,G500z00,G5yA.00,Gyu5000,AB4z300,G520400,SP2y100,A93y100,A17y200,G101.00,G52..00,G520z00,G52y300,G52yz00, |



|                           |                                                                                                                                                                                                                                                                                                                                                                                                                                                                                                                                                                                                                                                                                                                                                                                                                                                                                                                                                                                                           |                                                                                                                                   |               |                                                                              |           |                                                                                                                                                                                 |
|---------------------------|-----------------------------------------------------------------------------------------------------------------------------------------------------------------------------------------------------------------------------------------------------------------------------------------------------------------------------------------------------------------------------------------------------------------------------------------------------------------------------------------------------------------------------------------------------------------------------------------------------------------------------------------------------------------------------------------------------------------------------------------------------------------------------------------------------------------------------------------------------------------------------------------------------------------------------------------------------------------------------------------------------------|-----------------------------------------------------------------------------------------------------------------------------------|---------------|------------------------------------------------------------------------------|-----------|---------------------------------------------------------------------------------------------------------------------------------------------------------------------------------|
|                           |                                                                                                                                                                                                                                                                                                                                                                                                                                                                                                                                                                                                                                                                                                                                                                                                                                                                                                                                                                                                           |                                                                                                                                   |               |                                                                              |           | G53yz11,G010.00,G500.00,Gyu5200,A364300,A93y000,A98y200,G50z100,G52y400,G558300,G50000,G50z000,G520.00,G520100,Gyu5G00,Gyu5300,A742100,G10z.00,G50..00,G500311,G520500,Gyu5K00, |
| Narcolepsy                | G47.4,G47.42,G47.41,G47.429,G47.421,G47.411,G47.419                                                                                                                                                                                                                                                                                                                                                                                                                                                                                                                                                                                                                                                                                                                                                                                                                                                                                                                                                       | 347,347,347.1,347.1,347.11,347,347.01                                                                                             |               | G47.4                                                                        | 3470N     | F27..00,F271.00,F27z.00                                                                                                                                                         |
| Non-hemorrhagic stroke IP | P91.82,P91.821,P91.822,P91.823,P91.829,G43.6,G43.60,G43.61,I63,I63.0,I63.01,I63.03,I63.1,I63.11,I63.13,I63.2,I63.21,I63.23,I63.3,I63.31,I63.32,I63.33,I63.34,I63.4,I63.41,I63.42,I63.43,I63.44,I63.5,I63.51,I63.52,I63.53,I63.54,I63.81,I63.89,I63.6,I63.8,I63.9,I63.013,I63.033,I63.113,I63.133,I63.213,I63.233,I63.313,I63.323,I63.333,I63.343,I63.413,I63.423,I63.433,I63.443,I63.513,I63.523,I63.533,I63.543,I63.012,I63.09,I63.522,I63.039,I63.111,I63.22,I63.521,I63.239,I63.329,I63.342,I63.421,G43.601,G43.619,I63.219,I63.29,I63.319,I63.431,I63.432,I63.02,I63.20,I63.40,I63.422,I63.442,I63.50,I63.112,I63.311,I63.321,I63.529,I63.532,I63.019,I63.032,I63.119,I63.232,I63.411,I63.10,I63.312,I63.339,I63.132,I63.211,I63.449,I63.139,I63.212,I63.322,I63.331,I63.39,I63.419,I63.031,I63.12,I63.439,I63.541,I63.341,I63.412,I63.512,I63.531,I63.539,I63.30,I63.549,I63.131,I63.332,I63.429,I63.542,I63.00,I63.011,I63.231,I63.441,I63.49,I63.519,I63.59,G43.609,G43.611,I63.19,I63.349,I63.511 | 346.6,433.01,433.31,290.42,346.6,290.41,346.62,290.4,433.21,290.43,434.11,433.81,346.63,433.11,434.01,434.91,433.91,779.7,346.61, | K90.03,P70.02 | F01.0,F01.1,F01.3,I63,I63.0,I63.1,I63.2,I63.3,I63.4,I63.5,I63.6,I63.8,I63.9, | 2930      | Eu01100,G63..11,Gyu6G00,G676000,G64z.00,Q48E.00,Eu01000,G640000,G64z400,G63y000,Gyu6400,G64z300,E004.11,Q48E.11,C13A.00,Eu01300,G641000,G64z200,G63y100,G64..12,G6W..00,        |
| Pulmory embolism          | I26.93,I26.94,I26.I26.0,I26.9                                                                                                                                                                                                                                                                                                                                                                                                                                                                                                                                                                                                                                                                                                                                                                                                                                                                                                                                                                             | 415.1,415.19,415.11,415.13                                                                                                        | K93.00        | I26,I26.0,I26.9                                                              | 450 F,450 | G401.12,G401000,G402.00,G401.11,G401.00,F037000,F03..13,F037.00,                                                                                                                |
| Transverse myelitis       | G37.3                                                                                                                                                                                                                                                                                                                                                                                                                                                                                                                                                                                                                                                                                                                                                                                                                                                                                                                                                                                                     | 341.2,341.21,341.22                                                                                                               |               | G37.3                                                                        | 323 B     |                                                                                                                                                                                 |



|                             |          |                           |                             |                           |                           |                           |                           |                           |                           |                           |                           |                           |                           |                           |                           |
|-----------------------------|----------|---------------------------|-----------------------------|---------------------------|---------------------------|---------------------------|---------------------------|---------------------------|---------------------------|---------------------------|---------------------------|---------------------------|---------------------------|---------------------------|---------------------------|
| Acute myocardial infarction | 35 - 54  | 72.89<br>(70.99-74.82)    | 177.11<br>(173.97-180.29)   | NA                        | NA                        | 32.12<br>(26.74-38.27)    | 131.59<br>(115.84-148.88) | NA                        | NA                        | NA                        | NA                        | NA                        | NA                        | NA                        | NA                        |
| Acute myocardial infarction | 55 - 64  | 217.24<br>(212.97-221.58) | 503.96<br>(497.04-510.95)   | NA                        | NA                        | 106.91<br>(93.25-122.01)  | 303.45<br>(275.12-333.9)  | NA                        | NA                        | NA                        | NA                        | NA                        | NA                        | NA                        | NA                        |
| Acute myocardial infarction | 65 - 74  | 296.25<br>(272.84-321.12) | 676.91<br>(639.01-716.47)   | NA                        | NA                        | 169.86<br>(151.73-189.56) | 351.51<br>(321.16-383.95) | NA                        | NA                        | NA                        | NA                        | NA                        | NA                        | NA                        | NA                        |
| Acute myocardial infarction | 75 - 84  | NA                        | NA                          | NA                        | NA                        | 294.27<br>(263.91-327.18) | 467.24<br>(424.31-513.34) | NA                        | NA                        | NA                        | NA                        | NA                        | NA                        | NA                        | NA                        |
| Acute myocardial infarction | 85 - 114 | NA                        | NA                          | NA                        | NA                        | 672.82<br>(604.73-746.47) | 626.95<br>(549.03-712.83) | NA                        | NA                        | NA                        | NA                        | NA                        | NA                        | NA                        | NA                        |
| Deep vein thrombosis        | 1 - 5    | 12.44<br>(10.25-14.97)    | 19.09<br>(16.4-22.09)       | NA                        | NA                        | 107.82<br>(73.26-153.05)  | 125.12<br>(90.17-169.12)  | NA                        | NA                        | NA                        | NA                        | NA                        | NA                        | 5.24 (2.71-9.15)          | 7.19<br>(4.26-11.36)      |
| Deep vein thrombosis        | 6 - 17   | 20.03<br>(18.58-21.55)    | 18.78<br>(17.41-20.22)      | 6.21<br>(4.47-8.39)       | 1.56<br>(0.78-2.79)       | 52.05<br>(38.63-68.62)    | 48.53<br>(36.02-63.98)    | 8.24<br>(4.96-12.86)      | 3.33<br>(1.44-6.56)       | NA                        | NA                        | 15.37<br>(10.58-21.59)    | 6.42<br>(3.59-10.58)      | 35.77<br>(31.52-40.44)    | 20.34<br>(17.22-23.87)    |
| Deep vein thrombosis        | 18 - 34  | 159.67<br>(156.24-163.16) | 95.23<br>(92.56-97.96)      | 85.6<br>(79.87-91.63)     | 33.27<br>(29.78-37.06)    | 191.98<br>(174.71-210.5)  | 214.84<br>(189.61-242.49) | 100.15<br>(89.41-111.82)  | 39.32<br>(32.8-46.75)     | 78.11<br>(53.77-109.7)    | 42 (21.7-73.37)           | 148.32<br>(134.83-162.8)  | 52.67<br>(43.77-62.84)    | 240.42<br>(232.66-248.37) | 162.61<br>(154.4-171.14)  |
| Deep vein thrombosis        | 35 - 54  | 450.39<br>(445.66-455.16) | 384.05<br>(379.43-388.72)   | 159.47<br>(152.81-166.35) | 136.52<br>(130.42-142.83) | 319.36<br>(301.83-337.64) | 511.03<br>(479.47-544.12) | 255.89<br>(241.58-270.83) | 173.82<br>(161.68-186.64) | 176.71<br>(145.24-212.99) | 159.88<br>(125.97-200.12) | 313.7<br>(297.36-330.71)  | 202.01<br>(187.75-217.07) | 394.08<br>(386.6-401.67)  | 384.85<br>(375.55-394.32) |
| Deep vein thrombosis        | 55 - 64  | 670.01<br>(662.48-677.61) | 836.14<br>(827.2-845.14)    | 213.34<br>(202.13-225.02) | 214.98<br>(203.75-226.67) | 456.1<br>(427.35-486.28)  | 810.06<br>(763.25-858.99) | 247.45<br>(228.1-267.99)  | 309.99<br>(287.94-333.29) | 199.84<br>(153.22-256.18) | 289.79<br>(229.07-361.67) | 390.15<br>(364.16-417.5)  | 325.35<br>(300.51-351.69) | 470.49<br>(460.03-481.13) | 523.06<br>(510.44-535.91) |
| Deep vein thrombosis        | 65 - 74  | 823.32<br>(783.88-864.23) | 1034.03<br>(986.98-1082.75) | 386.82<br>(370.11-404.09) | 343.05<br>(326.91-359.79) | 608.5<br>(573.67-644.89)  | 884.29<br>(835.65-935.02) | 420.43<br>(392.65-449.65) | 407.46<br>(379.41-437.02) | 425.37<br>(346.1-517.36)  | 403.69<br>(323.34-497.95) | 588.03<br>(554.23-623.36) | 431.36<br>(400.94-463.48) | 621.68<br>(608.15-635.43) | 572.55<br>(558.11-587.28) |

|                      |          |                           |                           |                           |                           |                             |                              |                           |                           |                           |                           |                           |                           |                              |                           |    |
|----------------------|----------|---------------------------|---------------------------|---------------------------|---------------------------|-----------------------------|------------------------------|---------------------------|---------------------------|---------------------------|---------------------------|---------------------------|---------------------------|------------------------------|---------------------------|----|
| Deep vein thrombosis | 75 - 84  | NA                        | NA                        | 585.02<br>(559.2-611.73)  | 411.57<br>(387.76-436.45) | 919.14<br>(864.71-976.1)    | 1000.32<br>(936.89-1066.92)  | 635.45<br>(590.92-682.44) | 497.94<br>(455.08-543.75) | 591.98<br>(468.68-737.79) | 441.46<br>(329.71-578.92) | 834.15<br>(782.63-888.16) | 475.83<br>(432.5-522.33)  | 863.77<br>(847.4-880.39)     | 640.76<br>(624.99-656.83) |    |
| Deep vein thrombosis | 85 - 114 | NA                        | NA                        | 591.28<br>(554.08-630.32) | 384.11<br>(344.98-426.48) | 1522.45<br>(1418.76-1631.7) | 1265.79<br>(1153.69-1385.84) | 745.91<br>(671.83-825.92) | 603.12<br>(515.61-701.22) | 622.82<br>(446.94-844.92) | 573.57<br>(374.68-840.42) | 776.57<br>(708.43-849.49) | 568.02<br>(492.57-651.77) | 1120.05<br>(1086.17-1154.72) | 744.65<br>(709.32-781.29) |    |
| Hemorrhagic stroke   | 1 - 5    | 7.33<br>(5.67-9.33)       | 6.47<br>(4.95-8.31)       | NA                        | NA                        | 24.33<br>(9.78-50.13)       | 38.69<br>(20.6-66.16)        | NA                        | NA                        | NA                        | NA                        | NA                        | NA                        | NA                           | NA                        | NA |
| Hemorrhagic stroke   | 6 - 17   | 5.83<br>(5.06-6.67)       | 9.56<br>(8.59-10.61)      | NA                        | NA                        | 16.65<br>(9.52-27.04)       | 22.32<br>(14.15-33.49)       | NA                        | NA                        | NA                        | NA                        | NA                        | NA                        | NA                           | NA                        | NA |
| Hemorrhagic stroke   | 18 - 34  | 13.21<br>(12.24-14.24)    | 20.58<br>(19.35-21.87)    | NA                        | NA                        | 22.43<br>(16.8-29.34)       | 37.67<br>(27.58-50.25)       | NA                        | NA                        | NA                        | NA                        | NA                        | NA                        | NA                           | NA                        | NA |
| Hemorrhagic stroke   | 35 - 54  | 33.12<br>(31.85-34.43)    | 42.69<br>(41.16-44.26)    | NA                        | NA                        | 28.78<br>(23.7-34.63)       | 58.45<br>(48.13-70.33)       | NA                        | NA                        | NA                        | NA                        | NA                        | NA                        | NA                           | NA                        | NA |
| Hemorrhagic stroke   | 55 - 64  | 73.88<br>(71.4-76.42)     | 103.04<br>(99.93-106.22)  | NA                        | NA                        | 57.81<br>(47.89-69.18)      | 97.38<br>(81.64-115.26)      | NA                        | NA                        | NA                        | NA                        | NA                        | NA                        | NA                           | NA                        | NA |
| Hemorrhagic stroke   | 65 - 74  | 114.07<br>(99.74-129.87)  | 150.99<br>(133.42-170.23) | NA                        | NA                        | 88.86<br>(75.89-103.41)     | 145.23<br>(125.98-166.58)    | NA                        | NA                        | NA                        | NA                        | NA                        | NA                        | NA                           | NA                        | NA |
| Hemorrhagic stroke   | 75 - 84  | NA                        | NA                        | NA                        | NA                        | 155.58<br>(133.74-179.97)   | 191.28<br>(164.21-221.54)    | NA                        | NA                        | NA                        | NA                        | NA                        | NA                        | NA                           | NA                        | NA |
| Hemorrhagic stroke   | 85 - 114 | NA                        | NA                        | NA                        | NA                        | 282.84<br>(239.39-331.89)   | 271.2<br>(220.9-329.53)      | NA                        | NA                        | NA                        | NA                        | NA                        | NA                        | NA                           | NA                        | NA |
| Pulmonary embolism   | 1 - 5    | NA                        | 1.27<br>(0.66-2.22)       | NA                        | NA                        | NA                          | NA                           | NA                        | NA                        | NA                        | NA                        | NA                        | NA                        | NA                           | NA                        | NA |
| Pulmonary embolism   | 6 - 17   | 3.53<br>(2.94-4.2)        | 2.52<br>(2.04-3.09)       | 1.03<br>(0.42-2.13)       | NA                        | NA                          | 12.61<br>(6.72-21.57)        | 2.6 (0.95-5.66)           | NA                        | NA                        | NA                        | NA                        | NA                        | 1.96 (1.07-3.29)             | NA                        | NA |
| Pulmonary embolism   | 18 - 34  | 61.12<br>(59-63.29)       | 29.56<br>(28.08-31.09)    | 29.03<br>(25.74-32.63)    | 11.05<br>(9.09-13.32)     | 79.61<br>(68.63-91.84)      | 62.25<br>(49.05-77.92)       | 44.35<br>(37.31-52.33)    | 14.74<br>(10.87-19.54)    | 16.56<br>(6.66-34.12)     | NA                        | 15.05<br>(10.98-20.14)    | 4.71<br>(2.35-8.42)       | 34.5<br>(31.61-37.59)        | 22.21<br>(19.25-25.5)     |    |
| Pulmonary embolism   | 35 - 54  | 152.67<br>(149.92-155.45) | 129.53<br>(126.85-132.25) | 50.29<br>(46.58-54.21)    | 47.62<br>(44.05-51.4)     | 129.1<br>(118.05-140.9)     | 153.01<br>(135.99-171.58)    | 107.43<br>(98.23-117.25)  | 73.45<br>(65.63-81.94)    | 69<br>(49.93-92.94)       | 60.94<br>(40.81-87.52)    | 23.61<br>(19.29-28.61)    | 29.86<br>(24.54-35.99)    | 63.9<br>(60.91-66.99)        | 78.65<br>(74.49-83)       |    |

|                    |          |                           |                           |                           |                           |                           |                           |                           |                           |                           |                           |                           |                           |                           |                           |
|--------------------|----------|---------------------------|---------------------------|---------------------------|---------------------------|---------------------------|---------------------------|---------------------------|---------------------------|---------------------------|---------------------------|---------------------------|---------------------------|---------------------------|---------------------------|
| Pulmonary embolism | 55 - 64  | 222.49<br>(218.17-226.88) | 306.17<br>(300.79-311.63) | 90.33<br>(83.09-98.03)    | 109.48<br>(101.51-117.91) | 159.48<br>(142.68-177.71) | 236.16<br>(211.26-263.2)  | 128.07<br>(114.28-143.08) | 161.11<br>(145.34-178.13) | 103.02<br>(70.46-145.43)  | 118.69<br>(81.19-167.56)  | 32.51<br>(25.35-41.08)    | 70.64<br>(59.35-83.46)    | 95.41<br>(90.74-100.26)   | 144.65<br>(138.06-151.47) |
| Pulmonary embolism | 65 - 74  | 282.12<br>(259.3-306.42)  | 378.08<br>(349.93-407.89) | 169.89<br>(158.89-181.45) | 192.4<br>(180.36-205.02)  | 223.71<br>(202.83-246.17) | 262.28<br>(236.17-290.5)  | 228.29<br>(207.96-250.06) | 240.52<br>(219.11-263.46) | 161.23<br>(114.1-221.3)   | 189.89<br>(136.27-257.61) | 66.85<br>(55.82-79.44)    | 94.07<br>(80.18-109.67)   | 163.15<br>(156.27-170.25) | 197.55<br>(189.11-206.26) |
| Pulmonary embolism | 75 - 84  | NA                        | NA                        | 281.45<br>(263.66-300.13) | 262.39<br>(243.47-282.39) | 333.22<br>(300.85-368.14) | 328.21<br>(292.4-367.19)  | 317.05<br>(285.89-350.68) | 288.48<br>(256.12-323.79) | 291.48<br>(207.27-398.46) | 364.5<br>(263.79-490.98)  | 129<br>(109.31-151.21)    | 123.34<br>(101.83-148.05) | 282.65<br>(273.34-292.2)  | 254.65<br>(244.76-264.84) |
| Pulmonary embolism | 85 - 114 | NA                        | NA                        | 298.4<br>(272.2-326.46)   | 299.46<br>(265.05-337.1)  | 443.95<br>(389-504.49)    | 282.05<br>(230.69-341.43) | 289.09<br>(243.8-340.35)  | 338.09<br>(273.54-413.3)  | 302.85<br>(184.99-467.72) | 396.48<br>(234.98-626.6)  | 150.47<br>(121.45-184.34) | 105.82<br>(74.88-145.24)  | 313.13<br>(295.41-331.64) | 293.76<br>(271.77-317.05) |
| Appendicitis       | 1 - 5    | 32.11<br>(28.52-36.04)    | 41.58<br>(37.57-45.91)    | 11.04<br>(6.92-16.72)     | 10.02<br>(6.21-15.32)     | 48.67<br>(26.61-81.66)    | 44.64<br>(24.99-73.63)    | 38.61<br>(24.99-57)       | 39.23<br>(25.85-57.08)    | NA                        | NA                        | 14.56<br>(6.66-27.64)     | 31.58<br>(19.79-47.81)    | 77.32<br>(66.35-89.59)    | 82.73<br>(71.84-94.8)     |
| Appendicitis       | 6 - 17   | 160.32<br>(156.19-164.53) | 215.15<br>(210.46-219.92) | 35.03<br>(30.72-39.79)    | 47.6<br>(42.65-52.97)     | 172.93<br>(147.62-201.32) | 228.33<br>(200.07-259.46) | 180.67<br>(163.72-198.89) | 199.78<br>(182.29-218.5)  | 89.54<br>(55.42-136.87)   | 115.86<br>(76.36-168.58)  | 181.93<br>(164.32-200.91) | 187.2<br>(170.06-205.6)   | 487.49<br>(471.38-504)    | 439<br>(423.98-454.41)    |
| Appendicitis       | 18 - 34  | 201.06<br>(197.21-204.97) | 214.2<br>(210.19-218.28)  | 35.03<br>(31.4-38.96)     | 39.71<br>(35.89-43.82)    | 101.21<br>(88.79-114.89)  | 199.97<br>(175.66-226.7)  | 194.16<br>(179.08-210.17) | 143.92<br>(131.18-157.57) | 47.33<br>(28.91-73.1)     | 42 (21.7-73.37)           | 83.32<br>(73.29-94.34)    | 68.09<br>(57.92-79.53)    | 280.43<br>(272.04-289)    | 301.27<br>(290.05-312.81) |
| Appendicitis       | 35 - 54  | 166.53<br>(163.66-169.44) | 151.1<br>(148.21-154.04)  | 21.48<br>(19.09-24.1)     | 22.25<br>(19.83-24.88)    | 66.83<br>(58.95-75.46)    | 112.76<br>(98.23-128.85)  | 120.93<br>(111.17-131.33) | 97.5<br>(88.46-107.21)    | 33.69<br>(20.85-51.49)    | 16.8<br>(7.25-33.11)      | 32.24<br>(27.15-38)       | 33.12<br>(27.5-39.54)     | 102.87<br>(99.07-106.77)  | 116.49<br>(111.41-121.75) |
| Appendicitis       | 55 - 64  | 137.01<br>(133.62-140.46) | 118.34<br>(115-121.74)    | 19.82<br>(16.51-23.59)    | 16.28<br>(13.3-19.72)     | 61.7<br>(51.43-73.41)     | 66.35<br>(53.49-81.37)    | 82.63<br>(71.63-94.84)    | 75.21<br>(64.57-87.11)    | 25.73<br>(11.11-50.71)    | 25.94<br>(10.43-53.45)    | 18.58<br>(13.27-25.3)     | 15.86<br>(10.78-22.51)    | 63.78<br>(59.97-67.77)    | 68.05<br>(63.56-72.78)    |
| Appendicitis       | 65 - 74  | 109.59<br>(95.56-125.11)  | 96.13<br>(82.22-111.71)   | 14.16<br>(11.11-17.77)    | 15.76<br>(12.46-19.67)    | 43.09<br>(34.22-53.55)    | 46.25<br>(35.69-58.94)    | 79.29<br>(67.51-92.52)    | 75.21<br>(63.47-88.5)     | 33.9<br>(14.64-66.8)      | NA                        | 12.95<br>(8.38-19.12)     | 17.3<br>(11.67-24.69)     | 43.77<br>(40.25-47.53)    | 45.14<br>(41.16-49.4)     |
| Appendicitis       | 75 - 84  | NA                        | NA                        | 11.16<br>(7.86-15.38)     | 20.23<br>(15.24-26.33)    | 37.8<br>(27.46-50.74)     | 36.5<br>(25.28-51.01)     | 77.02<br>(62.09-94.45)    | 68.98<br>(53.67-87.3)     | NA                        | NA                        | 11.87<br>(6.49-19.91)     | 8.57 (3.7-16.89)          | 36.12<br>(32.85-39.63)    | 34.9<br>(31.31-38.8)      |

|              |          |                           |                           |                        |                        |                           |                           |                        |                         |                           |                           |                        |                        |                         |                         |
|--------------|----------|---------------------------|---------------------------|------------------------|------------------------|---------------------------|---------------------------|------------------------|-------------------------|---------------------------|---------------------------|------------------------|------------------------|-------------------------|-------------------------|
| Appendicitis | 85 - 114 | NA                        | NA                        | 10.63<br>(6.19-17.03)  | 14.17<br>(7.55-24.24)  | 35.79<br>(21.55-55.9)     | 29.5<br>(14.73-52.78)     | 40.06<br>(24.47-61.87) | 81.69<br>(51.79-122.58) | NA                        | NA                        | 8.08<br>(2.62-18.85)   | NA                     | 41.83<br>(35.52-48.93)  | 34.2<br>(26.99-42.74)   |
| Bells palsy  | 1 - 5    | 19.33<br>(16.57-22.43)    | 14.1<br>(11.81-16.72)     | 11.54<br>(7.32-17.32)  | 6.21 (3.3-10.61)       | 20.85<br>(7.65-45.39)     | 23.8<br>(10.28-46.9)      | 10.81<br>(4.35-22.27)  | 14.52<br>(6.97-26.71)   | NA                        | NA                        | NA                     | NA                     | 19.21<br>(13.96-25.79)  | 17.57<br>(12.77-23.59)  |
| Bells palsy  | 6 - 17   | 24.45<br>(22.86-26.13)    | 20.41<br>(18.99-21.92)    | 18.62<br>(15.51-22.17) | 16.29<br>(13.45-19.55) | 51 (37.73-67.42)          | 33.96<br>(23.65-47.23)    | 21.24<br>(15.72-28.09) | 17.9<br>(12.95-24.11)   | NA                        | NA                        | 8.85<br>(5.33-13.82)   | 10.69<br>(6.92-15.79)  | 25.25<br>(21.69-29.22)  | 25.9<br>(22.36-29.84)   |
| Bells palsy  | 18 - 34  | 59.49<br>(57.41-61.63)    | 45.27<br>(43.44-47.16)    | 34.82<br>(31.2-38.74)  | 28.84<br>(25.6-32.38)  | 60.95<br>(51.4-71.76)     | 84.34<br>(68.84-102.29)   | 41.49<br>(34.69-49.23) | 29.79<br>(24.16-36.34)  | 14.19<br>(5.21-30.89)     | 41.99<br>(21.7-73.35)     | 18.06<br>(13.57-23.56) | 19.69<br>(14.41-26.26) | 28.28<br>(25.67-31.1)   | 45.97<br>(41.65-50.6)   |
| Bells palsy  | 35 - 54  | 104.98<br>(102.71-107.29) | 101.38<br>(99.01-103.79)  | 37.73<br>(34.53-41.14) | 37.75<br>(34.58-41.14) | 65.01<br>(57.25-73.54)    | 82.44<br>(70.09-96.35)    | 45.12<br>(39.24-51.63) | 42.77<br>(36.86-49.35)  | 22.45<br>(12.28-37.67)    | 46.22<br>(28.96-69.97)    | 30.64<br>(25.69-36.27) | 35.01<br>(29.23-41.6)  | 35.3<br>(33.09-37.62)   | 51.88<br>(48.51-55.43)  |
| Bells palsy  | 55 - 64  | 124.06<br>(120.84-127.35) | 134.71<br>(131.15-138.34) | 36.8<br>(32.24-41.83)  | 46.17<br>(41.05-51.75) | 77.23<br>(65.69-90.21)    | 98.07<br>(82.28-116.01)   | 62.14<br>(52.66-72.84) | 60.82<br>(51.29-71.61)  | 38.6<br>(19.94-67.42)     | 51.89<br>(28.37-87.06)    | 33.9<br>(26.58-42.63)  | 40.42<br>(32-50.37)    | 44.35<br>(41.19-47.7)   | 59.88<br>(55.67-64.33)  |
| Bells palsy  | 65 - 74  | 128.04<br>(112.83-144.72) | 151.49<br>(133.89-170.75) | 33.09<br>(28.35-38.41) | 44.24<br>(38.58-50.51) | 89.37<br>(76.37-103.96)   | 106.02<br>(89.68-124.47)  | 74.33<br>(62.95-87.18) | 53.92<br>(44.06-65.33)  | 42.37<br>(20.32-77.92)    | 36.98<br>(15.97-72.87)    | 32.63<br>(25.08-41.75) | 32.87<br>(24.89-42.58) | 50.55<br>(46.75-54.57)  | 66.37<br>(61.52-71.49)  |
| Bells palsy  | 75 - 84  | NA                        | NA                        | 43.74<br>(36.91-51.47) | 40.45<br>(33.25-48.76) | 125.44<br>(105.92-147.52) | 119.21<br>(98.06-143.55)  | 91.21<br>(74.9-110.03) | 76.95<br>(60.73-96.18)  | 67.09<br>(30.68-127.36)   | 50.68<br>(18.6-110.31)    | 26.28<br>(17.86-37.3)  | 20.35<br>(12.25-31.79) | 67.3 (62.8-72.03)       | 67.57<br>(62.52-72.91)  |
| Bells palsy  | 85 - 114 | NA                        | NA                        | 23.77<br>(16.82-32.63) | 42.53<br>(30.24-58.14) | 129.99<br>(101.14-164.51) | 93.88<br>(65.39-130.57)   | 58.08<br>(38.9-83.41)  | 92.33<br>(60.31-135.28) | NA                        | NA                        | 25.85<br>(14.78-41.99) | 30.6<br>(15.28-54.75)  | 93.84<br>(84.27-104.21) | 91.94<br>(79.84-105.35) |
| Anaphylaxis  | 1 - 5    | 80.77<br>(75-86.86)       | 116.76<br>(109.96-123.87) | 12.55<br>(8.12-18.52)  | 16.71<br>(11.64-23.23) | 125.11<br>(87.63-173.21)  | 241.03<br>(191.41-299.58) | NA                     | 39.22<br>(25.84-57.06)  | 427.02<br>(293.94-599.69) | 397.57<br>(275.33-555.56) | NA                     | NA                     | 41.48<br>(33.56-50.7)   | 45.93<br>(37.92-55.13)  |
| Anaphylaxis  | 6 - 17   | 82.87<br>(79.91-85.91)    | 99.84<br>(96.65-103.1)    | 11.67<br>(9.24-14.55)  | 12.32<br>(9.87-15.2)   | 131.13<br>(109.23-156.13) | 141.66<br>(119.61-166.59) | 23.84<br>(17.96-31.04) | 25.81<br>(19.79-33.08)  | 682.04<br>(580.45-796.29) | 767.98<br>(659.59-889.09) | NA                     | 2.14<br>(0.69-4.99)    | 27.21<br>(23.51-31.32)  | 46.24<br>(41.46-51.41)  |
| Anaphylaxis  | 18 - 34  | 81.36<br>(78.92-83.86)    | 45.86<br>(44.01-47.76)    | 17.25<br>(14.73-20.07) | 13.57<br>(11.37-16.06) | 52.05<br>(43.26-62.1)     | 47.49<br>(36.06-61.39)    | 25.96<br>(20.65-32.23) | 17.81<br>(13.52-23.02)  | 151.4<br>(116.6-193.34)   | 150.47<br>(108.89-202.68) | NA                     | 2.57<br>(0.94-5.59)    | 20.68<br>(18.45-23.11)  | 23.53<br>(20.48-26.91)  |
| Anaphylaxis  | 35 - 54  | 76.86<br>(74.92-78.85)    | 41.9<br>(40.39-43.46)     | 16.39<br>(14.3-18.69)  | 8.26<br>(6.81-9.92)    | 32.63<br>(27.2-38.82)     | 24.52<br>(18.01-32.6)     | 20.52<br>(16.62-25.06) | 17.38<br>(13.69-21.75)  | 129.91<br>(103.16-161.46) | 71.41<br>(49.46-99.79)    | 3.86<br>(2.25-6.18)    | 1.9 (0.76-3.91)        | 23.95<br>(22.14-25.88)  | 21.78<br>(19.61-24.11)  |

|                          |          |                        |                        |                        |                        |                        |                         |                        |                        |                          |                         |                      |                        |                        |                        |
|--------------------------|----------|------------------------|------------------------|------------------------|------------------------|------------------------|-------------------------|------------------------|------------------------|--------------------------|-------------------------|----------------------|------------------------|------------------------|------------------------|
| Anaphylaxis              | 55 - 64  | 60.83<br>(58.58-63.14) | 43.73<br>(41.71-45.82) | 16.83<br>(13.79-20.33) | 10.17<br>(7.85-12.96)  | 23.79<br>(17.6-31.46)  | 10.81<br>(6.05-17.83)   | 41.69<br>(33.99-50.61) | 29.56<br>(23.04-37.34) | 138.3<br>(100.09-186.29) | 62.99<br>(36.7-100.86)  | 3.71 (1.6-7.32)      | NA                     | 23.91<br>(21.6-26.4)   | 19.72<br>(17.33-22.34) |
| Anaphylaxis              | 65 - 74  | 54.99<br>(45.19-66.27) | 40.1<br>(31.32-50.59)  | 12.62<br>(9.76-16.06)  | 9.9 (7.32-13.08)       | 14.36<br>(9.46-20.89)  | 12.09<br>(7.04-19.36)   | 26.08<br>(19.54-34.11) | 52.35<br>(42.64-63.61) | 131.34<br>(89.24-186.43) | 87.82<br>(52.87-137.14) | 8.29<br>(4.74-13.46) | NA                     | 19.64<br>(17.31-22.21) | 15.77<br>(13.46-18.37) |
| Anaphylaxis              | 75 - 84  | NA                     | NA                     | 8.45<br>(5.61-12.21)   | 9.19<br>(5.95-13.57)   | 21.47<br>(13.89-31.69) | 10.73<br>(5.15-19.74)   | 25.09<br>(16.93-35.82) | 27.97<br>(18.59-40.43) | 134.14<br>(79.5-212)     | 59.12<br>(23.77-121.8)  | NA                   | NA                     | 15.06<br>(12.97-17.39) | 10.38<br>(8.46-12.6)   |
| Anaphylaxis              | 85 - 114 | NA                     | NA                     | 6.25 (3-11.5)          | NA                     | 11.3 (4.15-24.59)      | NA                      | 12.01<br>(4.41-26.15)  | NA                     | NA                       | NA                      | NA                   | NA                     | 10.99<br>(7.89-14.91)  | 6.22 (3.4-10.43)       |
| Immune thrombocytopenia  | 1 - 5    | 13.78<br>(11.46-16.43) | 19.94<br>(17.19-23)    | 8.03<br>(4.59-13.04)   | 13.37<br>(8.88-19.32)  | 38.24<br>(19.09-68.42) | 29.76<br>(14.27-54.73)  | 10.81<br>(4.35-22.27)  | 13.07<br>(5.98-24.82)  | NA                       | NA                      | NA                   | NA                     | 8.73 (5.33-13.49)      | 15.98<br>(11.42-21.76) |
| Immune thrombocytopenia  | 6 - 17   | 11.62<br>(10.53-12.8)  | 10.15<br>(9.16-11.23)  | 4.43<br>(2.99-6.33)    | 5.1 (3.57-7.06)        | 41.64<br>(29.75-56.7)  | 35.91<br>(25.28-49.49)  | 6.94<br>(3.97-11.27)   | 6.66<br>(3.81-10.82)   | NA                       | NA                      | NA                   | NA                     | 5.61 (4.01-7.64)       | 5.15<br>(3.65-7.07)    |
| Immune thrombocytopenia  | 18 - 34  | 31.85<br>(30.33-33.43) | 13.18<br>(12.2-14.22)  | 4.55 (3.3-6.1)         | 2.31<br>(1.47-3.47)    | 52.07<br>(43.28-62.13) | 39.31<br>(28.98-52.12)  | 8.55<br>(5.63-12.44)   | 1.84<br>(0.68-4.01)    | NA                       | NA                      | 3.34 (1.6-6.15)      | NA                     | 3.63 (2.74-4.73)       | 3.98<br>(2.79-5.51)    |
| Immune thrombocytopenia  | 35 - 54  | 39.87<br>(38.48-41.31) | 26.23<br>(25.04-27.47) | 3.84<br>(2.87-5.03)    | 2.17<br>(1.47-3.1)     | 42.4<br>(36.18-49.39)  | 38.61<br>(30.32-48.48)  | 10.26<br>(7.57-13.61)  | 5.49<br>(3.52-8.17)    | 9.62<br>(3.53-20.94)     | NA                      | 1.36 (0.5-2.96)      | NA                     | 4.02 (3.3-4.85)        | 4.07<br>(3.17-5.15)    |
| Immune thrombocytopenia  | 55 - 64  | 47.7<br>(45.71-49.76)  | 52.08<br>(49.87-54.35) | 5.98<br>(4.23-8.2)     | 5.63<br>(3.95-7.8)     | 32.06<br>(24.79-40.78) | 53.36<br>(41.9-66.99)   | 11.85<br>(7.94-17.02)  | 13.09<br>(8.89-18.58)  | NA                       | NA                      | NA                   | NA                     | 4.39 (3.44-5.53)       | 4.39<br>(3.31-5.71)    |
| Immune thrombocytopenia  | 65 - 74  | 44.51<br>(35.75-54.77) | 65<br>(53.66-78.02)    | 8.22<br>(5.95-11.08)   | 8.69<br>(6.29-11.7)    | 38.3<br>(29.97-48.23)  | 74.73<br>(61.12-90.46)  | 12.8<br>(8.36-18.75)   | 18.14<br>(12.64-25.23) | NA                       | NA                      | 3.11<br>(1.14-6.76)  | NA                     | 6.39 (5.09-7.93)       | 6.6 (5.13-8.35)        |
| Immune thrombocytopenia  | 75 - 84  | NA                     | NA                     | 8.14<br>(5.37-11.85)   | 17.28<br>(12.7-22.98)  | 56.7<br>(43.85-72.14)  | 78.41<br>(61.46-98.58)  | 13.39<br>(7.65-21.74)  | 24.98<br>(16.17-36.88) | NA                       | NA                      | 6.78<br>(2.93-13.36) | NA                     | 5.18 (3.99-6.62)       | 10.07<br>(8.19-12.26)  |
| Immune thrombocytopenia  | 85 - 114 | NA                     | NA                     | 8.13<br>(4.33-13.9)    | 18.54<br>(10.8-29.68)  | 65.94<br>(45.93-91.7)  | 75.12<br>(49.91-108.56) | 18.02<br>(8.24-34.22)  | 39.05<br>(19.5-69.88)  | NA                       | NA                      | NA                   | NA                     | 6.7 (4.34-9.89)        | 9.77<br>(6.12-14.79)   |
| Myocarditis pericarditis | 1 - 5    | 5.33<br>(3.93-7.07)    | 6.26<br>(4.76-8.07)    | NA                     | NA                     | 52.15<br>(29.19-86.02) | 62.5<br>(38.69-95.54)   | NA                     | NA                     | NA                       | NA                      | NA                   | NA                     | 4.8 (2.4-8.59)         | 7.19<br>(4.26-11.36)   |
| Myocarditis pericarditis | 6 - 17   | 6.64<br>(5.82-7.54)    | 12.25<br>(11.15-13.43) | NA                     | 3.82<br>(2.52-5.56)    | 42.68<br>(30.63-57.9)  | 44.64<br>(32.68-59.55)  | NA                     | NA                     | NA                       | NA                      | NA                   | 3.42<br>(1.48-6.74)    | 13.75<br>(11.16-16.75) | 16<br>(13.24-19.16)    |
| Myocarditis pericarditis | 18 - 34  | 21.68<br>(20.42-22.98) | 39.9<br>(38.18-41.68)  | 7.54<br>(5.91-9.48)    | 23.32<br>(20.41-26.52) | 34.29<br>(27.23-42.61) | 93.4<br>(77.05-112.21)  | NA                     | NA                     | NA                       | NA                      | 8.03<br>(5.14-11.94) | 17.55<br>(12.59-23.81) | 25.18<br>(22.72-27.84) | 61.9<br>(56.88-67.25)  |









Cont

| AESI                        |          | JMDC_JA<br>PAN             | JMDC_JAPA<br>N              | MDCD_US                      | MDCD_US                      | MDCR_US                      | MDCR_US                      | OPTUM_EH<br>R_US             | OPTUM_EH<br>R_US           | OPTUM_SES<br>_US             | OPTUM_SES<br>_US            | SIDIAP_H_<br>SPAIN        | SIDIAP_H_S<br>PAIN           |
|-----------------------------|----------|----------------------------|-----------------------------|------------------------------|------------------------------|------------------------------|------------------------------|------------------------------|----------------------------|------------------------------|-----------------------------|---------------------------|------------------------------|
|                             | Age      | Female                     | Male                        | Female                       | Male                         | Female                       | Male                         | Female                       | Male                       | Female                       | Male                        | Female                    | Male                         |
| Non-hemorrhagic stroke      | 1 - 5    | 2.27<br>(0.98-4.47)        | 4.29 (2.45-6.97)            | 4.19 (3.17-5.44)             | 5.82 (4.63-7.23)             | NA                           | NA                           | 4.69 (3.57-6.06)             | 6.38 (5.11-7.86)           | 4.19 (2.48-6.63)             | 3.31 (1.85-5.46)            | NA                        | NA                           |
| Non-hemorrhagic stroke      | 6 - 17   | 2.41<br>(1.57-3.52)        | 3.95 (2.88-5.28)            | 5.23 (4.54-6)                | 5.04 (4.39-5.77)             | NA                           | NA                           | 4.08 (3.48-4.75)             | 4.66 (4.03-5.37)           | 2.97 (2.19-3.96)             | 4 (3.1-5.09)                | NA                        | 2.33 (1.01-4.59)             |
| Non-hemorrhagic stroke      | 18 - 34  | 7.53<br>(5.99-9.34)        | 8.04 (6.73-9.53)            | 45.04<br>(42.69-47.49)       | 42.76<br>(39.65-46.04)       | NA                           | NA                           | 14.39 (13.6-15.21)           | 17.05<br>(15.97-18.19)     | 22.24 (20.4-24.2)            | 18.84<br>(17.21-20.58)      | 8.44<br>(6.03-11.5)       | 7.94 (5.59-10.94)            |
| Non-hemorrhagic stroke      | 35 - 54  | 40.61<br>(37.99-43.37)     | 66.24<br>(63.25-69.33)      | 305.32<br>(298.36-312.41)    | 387.53<br>(376.97-398.31)    | NA                           | NA                           | 65.71<br>(64.26-67.19)       | 99.39<br>(97.22-101.61)    | 134.03<br>(130.29-137.85)    | 130.65<br>(127.04-134.34)   | 40.62<br>(36.5-45.07)     | 72.27 (66.8-78.07)           |
| Non-hemorrhagic stroke      | 55 - 64  | 111.57<br>(103.88-119.67)  | 242.98<br>(233.46-252.8)    | 846.22<br>(829.14-863.57)    | 1100.23<br>(1077.7-1123.11)  | NA                           | NA                           | 150.29<br>(147.41-153.21)    | 251.86<br>(247.57-256.21)  | 442.01<br>(433.01-451.16)    | 539.42<br>(529.39-549.59)   | 112.99<br>(102.1-124.71)  | 303.28<br>(285.31-322.08)    |
| Non-hemorrhagic stroke      | 65 - 74  | 307.55<br>(283.37-333.24)  | 564.28<br>(535.34-594.38)   | 1027.72<br>(1004.85-1050.98) | 1342.11<br>(1307.49-1377.41) | 597.68<br>(578.86-616.96)    | 794.61<br>(771.32-818.43)    | 264.29<br>(259.72-268.92)    | 377.95<br>(371.76-384.23)  | 818.31<br>(808.54-828.17)    | 994.07<br>(981.96-1006.29)  | 258.46<br>(240.81-277.07) | 511.83<br>(486.11-538.56)    |
| Non-hemorrhagic stroke      | 75 - 84  | 794.37<br>(553.31-1104.78) | 1153.98<br>(888.71-1473.61) | 1401.44<br>(1366.13-1437.43) | 1606.03<br>(1547.38-1666.32) | 1345.43<br>(1312.72-1378.76) | 1594.88<br>(1555.47-1635.03) | 555.68<br>(546.69-564.79)    | 655.47<br>(644.31-666.77)  | 1525.28<br>(1509.31-1541.39) | 1739.54<br>(1720.05-1759.2) | 614.73<br>(583.01-647.74) | 868.74<br>(827.19-911.85)    |
| Non-hemorrhagic stroke      | 85 - 114 | NA                         | NA                          | 1882.06<br>(1819.71-1946)    | 1793.43<br>(1673.77-1919.4)  | 2699.42<br>(2635.26-2764.75) | 2862.26<br>(2777.61-2948.84) | 1068.56<br>(1050.76-1086.59) | 1010.5<br>(988.15-1033.23) | 2652.97<br>(2622.79-2683.4)  | 2766.21<br>(2725.77-2807.1) | 914.96<br>(865.84-966.14) | 1109.01<br>(1036.61-1185.12) |
| Acute myocardial infarction | 1 - 5    | NA                         | NA                          | NA                           | 0.43 (0.16-0.93)             | NA                           | NA                           | NA                           | 0.58 (0.25-1.14)           | NA                           | NA                          | NA                        | NA                           |
| Acute myocardial infarction | 6 - 17   | NA                         | 0.61 (0.25-1.27)            | 0.44 (0.25-0.7)              | 0.74 (0.5-1.05)              | NA                           | NA                           | 0.52 (0.32-0.79)             | 0.72 (0.48-1.02)           | 0.82 (0.44-1.41)             | 1.09 (0.65-1.72)            | NA                        | NA                           |
| Acute myocardial infarction | 18 - 34  | 1.19<br>(0.64-2.04)        | 2.24 (1.57-3.08)            | 31.59<br>(29.62-33.65)       | 51.17<br>(47.76-54.75)       | NA                           | NA                           | 10.75<br>(10.07-11.46)       | 28.01<br>(26.62-29.46)     | 9.01 (7.85-10.29)            | 20.68<br>(18.97-22.5)       | 2.11<br>(1.01-3.88)       | 9.01 (6.5-12.18)             |
| Acute myocardial infarction | 35 - 54  | 7.01<br>(5.95-8.21)        | 45.18<br>(42.72-47.74)      | 296.5<br>(289.64-303.48)     | 542.91<br>(530.38-555.65)    | NA                           | NA                           | 75.63<br>(74.07-77.21)       | 197.37<br>(194.29-200.48)  | 101.32<br>(98.07-104.66)     | 205.92<br>(201.37-210.54)   | 33.64<br>(29.9-37.71)     | 187.88<br>(178.99-197.1)     |
| Acute myocardial infarction | 55 - 64  | 23.66<br>(20.2-27.55)      | 135.73<br>(128.64-143.11)   | 849<br>(831.89-866.38)       | 1203.14<br>(1179.56-1227.07) | NA                           | NA                           | 189.78<br>(186.55-193.06)    | 449.96<br>(444.21-455.76)  | 389.98<br>(381.52-398.58)    | 735.69<br>(723.96-747.57)   | 118.74<br>(107.58-130.75) | 577.57<br>(552.63-603.33)    |

|                             |          |                            |                           |                              |                              |                              |                              |                              |                              |                              |                              |                           |                           |
|-----------------------------|----------|----------------------------|---------------------------|------------------------------|------------------------------|------------------------------|------------------------------|------------------------------|------------------------------|------------------------------|------------------------------|---------------------------|---------------------------|
| Acute myocardial infarction | 65 - 74  | 65.28<br>(54.42-77.67)     | 216.26<br>(198.51-235.16) | 970.27<br>(948.07-992.87)    | 1326.08<br>(1291.68-1361.16) | 564.11<br>(545.83-582.85)    | 1043.02<br>(1016.28-1070.28) | 320.81<br>(315.78-325.91)    | 601.49<br>(593.66-609.4)     | 715.71<br>(706.58-724.93)    | 1172.53<br>(1159.36-1185.81) | 204.76<br>(189.08-221.39) | 646.44<br>(617.47-676.42) |
| Acute myocardial infarction | 75 - 84  | NA                         | 268.38<br>(150.21-442.66) | 1251.55<br>(1218.22-1285.56) | 1585.65<br>(1527.42-1645.52) | 1136.06<br>(1106.05-1166.69) | 1760.2<br>(1718.78-1802.37)  | 606.73<br>(597.33-616.23)    | 904.75<br>(891.62-918.02)    | 1234.26<br>(1219.91-1248.74) | 1807.26<br>(1787.39-1827.3)  | 357.78<br>(333.69-383.15) | 767.92<br>(728.88-808.5)  |
| Acute myocardial infarction | 85 - 114 | NA                         | NA                        | 1555.34<br>(1498.79-1613.47) | 2024.13<br>(1896.86-2157.71) | 2232.63<br>(2174.44-2291.98) | 3121.63<br>(3033.2-3211.98)  | 1086.47<br>(1068.52-1104.65) | 1400.11<br>(1373.74-1426.85) | 2078.63<br>(2052.01-2105.52) | 2885.13<br>(2843.84-2926.86) | 418.5<br>(385.54-453.51)  | 737.42<br>(678.67-799.9)  |
| Deep vein thrombosis        | 1 - 5    | 15.88<br>(11.99-20.62)     | 20.11<br>(15.82-25.21)    | 16.99<br>(14.85-19.35)       | 21.02<br>(18.69-23.56)       | NA                           | NA                           | 9.15 (7.55-10.98)            | 12.54<br>(10.74-14.55)       | 17 (13.33-21.38)             | 20.51<br>(16.56-25.13)       | 6.46<br>(2.37-14.06)      | NA                        |
| Deep vein thrombosis        | 6 - 17   | 28.41<br>(25.32-31.77)     | 30.27<br>(27.16-33.64)    | 20.81 (19.4-22.29)           | 19.08<br>(17.78-20.45)       | NA                           | NA                           | 14.67<br>(13.52-15.89)       | 14.4 (13.27-15.6)            | 19.56<br>(17.44-21.86)       | 19.89 (17.8-22.16)           | 7.38<br>(4.68-11.07)      | 7.57 (4.94-11.09)         |
| Deep vein thrombosis        | 18 - 34  | 151.3<br>(144.08-158.79)   | 45.96<br>(42.75-49.35)    | 278.72<br>(272.82-284.72)    | 210.42<br>(203.46-217.57)    | NA                           | NA                           | 149.48<br>(146.92-152.07)    | 131.53<br>(128.49-134.62)    | 161.02<br>(156-166.16)       | 97.61<br>(93.85-101.48)      | 65.26<br>(58.18-72.95)    | 42.29<br>(36.59-48.62)    |
| Deep vein thrombosis        | 35 - 54  | 212.77<br>(206.7-218.96)   | 117.15<br>(113.16-121.24) | 866.16<br>(854.37-878.07)    | 957.1<br>(940.42-974.01)     | NA                           | NA                           | 352.27<br>(348.9-355.66)     | 419.84<br>(415.35-424.37)    | 490.53<br>(483.33-497.81)    | 401.58<br>(395.21-408.01)    | 158.88<br>(150.62-167.46) | 143.63<br>(135.87-151.71) |
| Deep vein thrombosis        | 55 - 64  | 335.09<br>(321.66-348.93)  | 275.26<br>(265.11-285.69) | 1352.08<br>(1330.4-1374.02)  | 1480.05<br>(1453.84-1506.6)  | NA                           | NA                           | 491.33<br>(486.11-496.59)    | 734.1<br>(726.75-741.52)     | 930.75<br>(917.63-944.02)    | 1056.15<br>(1042.06-1070.38) | 288.41<br>(270.84-306.82) | 325.69<br>(307.06-345.16) |
| Deep vein thrombosis        | 65 - 74  | 579.46<br>(546.04-614.38)  | 477.89<br>(451.3-505.64)  | 1442.76<br>(1415.58-1470.33) | 1509.52<br>(1472.75-1546.98) | 1371.23<br>(1342.54-1400.38) | 1557.05<br>(1524.26-1590.37) | 711.06<br>(703.54-718.64)    | 901.5<br>(891.89-911.18)     | 1325.56<br>(1313.08-1338.12) | 1494.65<br>(1479.75-1509.66) | 502.34<br>(477.57-528.06) | 441.3<br>(417.44-466.16)  |
| Deep vein thrombosis        | 75 - 84  | 726.94<br>(497.23-1026.23) | 664.03<br>(467.54-915.28) | 1747.85<br>(1708.3-1788.08)  | 1690.03<br>(1629.8-1751.91)  | 2167.67<br>(2125.91-2210.04) | 2256.26<br>(2209.19-2304.08) | 1071.35<br>(1058.82-1083.99) | 1172.54<br>(1157.56-1187.66) | 1953.58<br>(1935.45-1971.84) | 2030.21<br>(2009.11-2051.48) | 807.95<br>(771.46-845.72) | 601.31<br>(566.84-637.32) |
| Deep vein thrombosis        | 85 - 114 | NA                         | NA                        | 2050.77<br>(1985.51-2117.62) | 1870.07<br>(1747.64-1998.8)  | 2920.22<br>(2853.28-2988.33) | 3033.06<br>(2945.72-3122.34) | 1422.23<br>(1401.64-1443.04) | 1386.23<br>(1359.98-1412.86) | 2648.7<br>(2618.51-2679.16)  | 2596.45<br>(2557.24-2636.12) | 879.49<br>(831.29-929.75) | 647.58<br>(592.59-706.3)  |
| Hemorrhagic stroke          | 1 - 5    | 1.98<br>(0.8-4.09)         | 2.95 (1.47-5.28)          | 12.43<br>(10.61-14.47)       | 14.98<br>(13.03-17.15)       | NA                           | NA                           | 5.57 (4.34-7.04)             | 6.67 (5.37-8.18)             | 6.75 (4.52-9.7)              | 7.94 (5.56-10.99)            | NA                        | NA                        |
| Hemorrhagic stroke          | 6 - 17   | 2.13<br>(1.35-3.19)        | 4.74 (3.56-6.18)          | 7.9 (7.04-8.84)              | 12.17<br>(11.13-13.27)       | NA                           | NA                           | 3.71 (3.14-4.35)             | 5.64 (4.95-6.41)             | 5.57 (4.47-6.86)             | 10.98 (9.43-12.7)            | 1.92<br>(0.71-4.19)       | 3.49 (1.8-6.1)            |
| Hemorrhagic stroke          | 18 - 34  | 5.78<br>(4.44-7.4)         | 4.47 (3.51-5.62)          | 29.49<br>(27.59-31.48)       | 51.66<br>(48.24-55.25)       | NA                           | NA                           | 13.15 (12.4-13.93)           | 24.63<br>(23.32-25.99)       | 14.22<br>(12.76-15.8)        | 24.64<br>(22.77-26.62)       | 7.6 (5.32-10.52)          | 8.58 (6.13-11.69)         |
| Hemorrhagic stroke          | 35 - 54  | 22.44<br>(20.5-24.51)      | 25.1<br>(23.27-27.03)     | 94.22<br>(90.38-98.19)       | 160.22<br>(153.46-167.2)     | NA                           | NA                           | 24.08<br>(23.21-24.98)       | 43.06<br>(41.63-44.52)       | 43.04<br>(40.93-45.23)       | 50.4 (48.17-52.71)           | 34.32<br>(30.55-38.43)    | 43.8 (39.56-48.36)        |

|                    |          |                        |                        |                        |                        |                         |                          |                        |                        |                        |                        |                        |                        |
|--------------------|----------|------------------------|------------------------|------------------------|------------------------|-------------------------|--------------------------|------------------------|------------------------|------------------------|------------------------|------------------------|------------------------|
| Hemorrhagic stroke | 55 - 64  | 54.75 (49.41-60.51)    | 65.99 (61.08-71.19)    | 198.3 (190.09-206.76)  | 329.06 (316.84-341.64) | NA                      | NA                       | 46.43 (44.84-48.06)    | 80.17 (77.76-82.64)    | 118.95 (114.3-123.73)  | 156.95 (151.57-162.47) | 60.77 (52.86-69.52)    | 94.35 (84.46-105.08)   |
| Hemorrhagic stroke | 65 - 74  | 99.74 (86.2-114.81)    | 105.05 (92.8-118.46)   | 197.45 (187.53-207.75) | 302.89 (286.63-319.83) | 170.07 (160.12-180.48)  | 251.23 (238.24-264.74)   | 74.31 (71.9-76.78)     | 119.09 (115.63-122.64) | 214.24 (209.27-219.3)  | 292.7 (286.17-299.35)  | 100.31 (89.44-112.14)  | 162.37 (148.05-177.7)  |
| Hemorrhagic stroke | 75 - 84  | 225.73 (108.25-415.13) | 196.6 (98.14-351.78)   | 305.89 (289.58-322.87) | 368.64 (340.97-397.96) | 413.01 (395.04-431.58)  | 549.93 (526.99-573.6)    | 163.33 (158.48-168.29) | 221.33 (214.88-227.93) | 441.79 (433.25-450.46) | 563.96 (552.94-575.15) | 180.93 (163.94-199.2)  | 269.93 (247.05-294.35) |
| Hemorrhagic stroke | 85 - 114 | NA                     | NA                     | 446.1 (416.17-477.61)  | 541.05 (476.55-611.84) | 777.27 (743.27-812.42)  | 1048.91 (998.28-1101.45) | 316.2 (306.58-326.05)  | 372.67 (359.18-386.54) | 757.98 (742.01-774.21) | 987.9 (963.96-1012.29) | 203.53 (180.78-228.36) | 289.42 (253.15-329.44) |
| Pulmonary embolism | 1 - 5    | 1.7 (0.62-3.7)         | NA                     | 1.05 (0.57-1.76)       | 1.28 (0.76-2.02)       | NA                      | NA                       | 8.67 (7.12-10.46)      | 7.1 (5.77-8.65)        | NA                     | NA                     | NA                     | NA                     |
| Pulmonary embolism | 6 - 17   | 1.3 (0.71-2.17)        | 1.67 (1-2.6)           | 4.75 (4.09-5.48)       | 3.28 (2.75-3.87)       | NA                      | NA                       | 9.8 (8.87-10.81)       | 7.41 (6.61-8.29)       | 2.78 (2.02-3.74)       | 2.12 (1.48-2.95)       | 1.92 (0.71-4.19)       | 1.75 (0.64-3.8)        |
| Pulmonary embolism | 18 - 34  | 9.91 (8.13-11.97)      | 4.35 (3.41-5.48)       | 140.84 (136.66-145.12) | 84.82 (80.42-89.39)    | NA                      | NA                       | 72.04 (70.27-73.85)    | 50.26 (48.39-52.19)    | 60.54 (57.48-63.73)    | 30.89 (28.79-33.1)     | 15.62 (12.27-19.61)    | 9.87 (7.23-13.17)      |
| Pulmonary embolism | 35 - 54  | 20.85 (18.98-22.85)    | 17.46 (15.94-19.08)    | 378.55 (370.79-386.44) | 387.63 (377.06-398.41) | NA                      | NA                       | 143.49 (141.34-145.66) | 161.7 (158.92-164.52)  | 170.74 (166.51-175.05) | 135.96 (132.28-139.73) | 33.06 (29.36-37.1)     | 43.46 (39.24-48.01)    |
| Pulmonary embolism | 55 - 64  | 33.07 (28.95-37.61)    | 42.43 (38.51-46.65)    | 591.53 (577.27-606.05) | 618.81 (601.97-635.99) | NA                      | NA                       | 198.96 (195.64-202.31) | 290.69 (286.08-295.36) | 335.15 (327.31-343.12) | 378.35 (369.97-386.88) | 76.26 (67.37-86)       | 128.6 (117.01-141.04)  |
| Pulmonary embolism | 65 - 74  | 66.82 (55.83-79.35)    | 68.7 (58.87-79.7)      | 598.16 (580.77-615.93) | 606.75 (583.62-630.56) | 495.56 (478.44-513.13)  | 603.63 (583.37-624.42)   | 302.59 (297.7-307.54)  | 371.69 (365.55-377.91) | 494.42 (486.85-502.09) | 558.53 (549.47-567.69) | 166.01 (151.93-181.05) | 213.45 (196.98-230.93) |
| Pulmonary embolism | 75 - 84  | 112.89 (36.66-263.45)  | 89.25 (28.98-208.29)   | 722.56 (697.33-748.47) | 721.44 (682.45-762.07) | 823.36 (797.86-849.47)  | 869.45 (840.5-899.14)    | 466.88 (458.64-475.23) | 476.15 (466.65-485.79) | 747.48 (736.34-758.75) | 768.4 (755.51-781.45)  | 301.73 (279.65-325.09) | 283.92 (260.43-308.96) |
| Pulmonary embolism | 85 - 114 | NA                     | NA                     | 812.12 (771.48-854.34) | 695.84 (622.34-775.62) | 993.06 (954.53-1032.75) | 1034.89 (984.56-1087.12) | 529.71 (517.22-542.43) | 496.24 (480.64-512.22) | 884.62 (867.34-902.15) | 901.75 (878.87-925.07) | 362.18 (331.57-394.86) | 301.11 (264.07-341.89) |
| Appendicitis       | 1 - 5    | 17.29 (13.23-22.21)    | 19.31 (15.11-24.31)    | 37.73 (34.51-41.17)    | 46.74 (43.23-50.45)    | NA                      | NA                       | 27.05 (24.26-30.09)    | 37.32 (34.17-40.69)    | 36.57 (31.08-42.76)    | 47.43 (41.3-54.21)     | 67.86 (52.14-86.82)    | 69.2 (53.95-87.43)     |
| Appendicitis       | 6 - 17   | 145.56 (138.45-152.94) | 204.71 (196.48-213.19) | 161.15 (157.18-165.18) | 213.89 (209.48-218.38) | NA                      | NA                       | 151.5 (147.74-155.33)  | 213.73 (209.32-218.21) | 165.61 (159.32-172.08) | 212.04 (205.06-219.19) | 184.4 (169.62-200.12)  | 267.27 (250.24-285.15) |
| Appendicitis       | 18 - 34  | 197.18 (188.92-205.71) | 185.51 (179-192.2)     | 175.01 (170.34-179.77) | 162.96 (156.84-169.26) | NA                      | NA                       | 147.45 (144.91-150.03) | 208.07 (204.24-211.95) | 193.93 (188.41-199.56) | 206.71 (201.22-212.31) | 142.04 (131.5-153.2)   | 159.68 (148.4-171.59)  |

|              |          |                          |                           |                           |                           |                           |                           |                          |                           |                           |                           |                           |                           |
|--------------|----------|--------------------------|---------------------------|---------------------------|---------------------------|---------------------------|---------------------------|--------------------------|---------------------------|---------------------------|---------------------------|---------------------------|---------------------------|
| Appendicitis | 35 - 54  | 122.08<br>(117.5-126.8)  | 126.94<br>(122.79-131.19) | 142.83<br>(138.08-147.7)  | 117.08<br>(111.31-123.07) | NA                        | NA                        | 111.59<br>(109.7-113.51) | 124.76<br>(122.32-127.24) | 165.51<br>(161.34-169.75) | 152.27<br>(148.37-156.25) | 84.36<br>(78.38-90.68)    | 91.12<br>(84.96-97.6)     |
| Appendicitis | 55 - 64  | 93.43<br>(86.41-100.87)  | 105.22<br>(98.99-111.74)  | 103.02<br>(97.13-109.17)  | 101.42<br>(94.69-108.5)   | NA                        | NA                        | 83.95<br>(81.81-86.14)   | 83.61<br>(81.15-86.13)    | 147.38<br>(142.21-152.7)  | 128.35<br>(123.48-133.35) | 68.23<br>(59.84-77.47)    | 64.13<br>(56.02-73.08)    |
| Appendicitis | 65 - 74  | 75.57<br>(63.85-88.83)   | 93.2<br>(81.69-105.88)    | 67.09<br>(61.37-73.2)     | 69.89 (62.2-78.26)        | 111.8<br>(103.76-120.3)   | 106.69<br>(98.29-115.62)  | 59.62<br>(57.46-61.83)   | 65.95<br>(63.38-68.6)     | 106.66<br>(103.16-110.25) | 111.12<br>(107.11-115.25) | 43.49<br>(36.44-51.51)    | 66.03<br>(57.02-76.06)    |
| Appendicitis | 75 - 84  | NA                       | 89.25<br>(28.98-208.29)   | 48.96<br>(42.58-56.03)    | 63.93<br>(52.74-76.8)     | 99.84<br>(91.11-109.17)   | 112.59<br>(102.36-123.56) | 47.8 (45.2-50.52)        | 55.89<br>(52.67-59.25)    | 89.8 (85.98-93.75)        | 103.6<br>(98.92-108.45)   | 41.83<br>(33.88-51.08)    | 46.87<br>(37.64-57.68)    |
| Appendicitis | 85 - 114 | NA                       | NA                        | 37.76<br>(29.44-47.71)    | 48.85<br>(30.97-73.3)     | 67.77<br>(58.02-78.69)    | 114.75<br>(98.47-132.96)  | 33.24<br>(30.17-36.53)   | 43.95<br>(39.41-48.88)    | 68.21<br>(63.49-73.19)    | 79.21<br>(72.55-86.31)    | 36.47<br>(27.24-47.83)    | 47.98<br>(33.95-65.85)    |
| Bells palsy  | 1 - 5    | 11.62<br>(8.34-15.77)    | 16.36<br>(12.51-21.01)    | 21.63<br>(19.21-24.27)    | 17.47<br>(15.35-19.79)    | NA                        | NA                        | 13.61<br>(11.64-15.8)    | 15.36<br>(13.36-17.58)    | 14.91<br>(11.48-19.03)    | 12.35 (9.33-16.04)        | 16.15<br>(9.04-26.64)     | 25.69<br>(16.78-37.65)    |
| Bells palsy  | 6 - 17   | 18.04<br>(15.6-20.76)    | 15.09<br>(12.92-17.52)    | 39.49<br>(37.54-41.51)    | 27.88 (26.3-29.52)        | NA                        | NA                        | 27.5 (25.91-29.15)       | 22.89<br>(21.46-24.38)    | 20.69<br>(18.51-23.06)    | 19.53<br>(17.45-21.78)    | 44.59<br>(37.48-52.64)    | 31.73<br>(26.05-38.27)    |
| Bells palsy  | 18 - 34  | 34.7<br>(31.29-38.38)    | 37.49<br>(34.59-40.56)    | 80.9 (77.74-84.16)        | 52.19<br>(48.76-55.81)    | NA                        | NA                        | 54.29<br>(52.76-55.86)   | 50.92<br>(49.04-52.86)    | 61.02<br>(57.95-64.22)    | 45.55<br>(42.99-48.21)    | 59.96<br>(53.19-67.35)    | 48.72<br>(42.59-55.48)    |
| Bells palsy  | 35 - 54  | 60.19<br>(56.99-63.52)   | 69.81<br>(66.74-72.98)    | 139.63<br>(134.94-144.45) | 121.17<br>(115.31-127.26) | NA                        | NA                        | 79.32<br>(77.73-80.94)   | 94.33<br>(92.21-96.48)    | 111.38<br>(107.98-114.87) | 103.77<br>(100.55-107.06) | 77 (71.29-83.04)          | 82.78<br>(76.92-88.97)    |
| Bells palsy  | 55 - 64  | 84.97<br>(78.29-92.08)   | 92.1<br>(86.28-98.21)     | 157.6<br>(150.3-165.16)   | 137.11<br>(129.26-145.3)  | NA                        | NA                        | 87.38<br>(85.19-89.61)   | 105.59<br>(102.82-108.42) | 156.18<br>(150.86-161.65) | 154.2<br>(148.87-159.67)  | 111.51<br>(100.7-123.16)  | 126.83<br>(115.32-139.18) |
| Bells palsy  | 65 - 74  | 102.29<br>(88.57-117.53) | 106.59<br>(94.25-120.09)  | 127.94<br>(119.98-136.28) | 130.45<br>(119.87-141.72) | 169.53<br>(159.6-179.92)  | 189.87<br>(178.6-201.66)  | 93.57<br>(90.86-96.33)   | 100.14<br>(96.97-103.4)   | 185.46<br>(180.84-190.17) | 178.76<br>(173.66-183.96) | 131.14<br>(118.67-144.58) | 182.3<br>(167.11-198.5)   |
| Bells palsy  | 75 - 84  | 180.55<br>(77.95-355.75) | NA                        | 136.25<br>(125.45-147.73) | 122.25<br>(106.56-139.61) | 180.36<br>(168.57-192.76) | 190.66<br>(177.28-204.79) | 97.06<br>(93.33-100.9)   | 103.08<br>(98.7-107.61)   | 208.91<br>(203.05-214.89) | 195.68<br>(189.22-202.31) | 197.02<br>(179.27-216.05) | 232.38<br>(211.2-255.12)  |
| Bells palsy  | 85 - 114 | NA                       | NA                        | 124.65<br>(109.09-141.8)  | 93.46<br>(67.91-125.46)   | 180.1<br>(163.96-197.39)  | 189.3<br>(168.21-212.31)  | 92.84<br>(87.66-98.24)   | 95.54<br>(88.78-102.68)   | 192.43<br>(184.44-200.67) | 184.89<br>(174.65-195.59) | 213.32<br>(190.02-238.7)  | 238.73<br>(205.91-275.3)  |
| Anaphylaxis  | 1 - 5    | NA                       | NA                        | 47.6 (43.97-51.45)        | 71.36<br>(67.02-75.91)    | NA                        | NA                        | 46.78<br>(43.08-50.72)   | 74.56<br>(70.08-79.26)    | 77.55<br>(69.45-86.35)    | 127.49<br>(117.3-138.32)  | 12.92<br>(6.68-22.57)     | 36.56<br>(25.74-50.39)    |
| Anaphylaxis  | 6 - 17   | NA                       | NA                        | 59.03<br>(56.64-61.49)    | 60.1 (57.77-62.5)         | NA                        | NA                        | 64.5 (62.05-67.01)       | 77.65 (75-80.37)          | 86.06<br>(81.55-90.76)    | 104.17<br>(99.31-109.22)  | 14.75<br>(10.8-19.68)     | 21.83<br>(17.17-27.36)    |

|                          |          |                     |                     |                     |                      |                        |                        |                     |                       |                        |                        |                     |                     |
|--------------------------|----------|---------------------|---------------------|---------------------|----------------------|------------------------|------------------------|---------------------|-----------------------|------------------------|------------------------|---------------------|---------------------|
| Anaphylaxis              | 18 - 34  | NA                  | NA                  | 58.15 (55.47-60.92) | 35.62 (32.79-38.63)  | NA                     | NA                     | 55.82 (54.26-57.41) | 43.54 (41.8-45.33)    | 79.28 (75.77-82.91)    | 44.24 (41.72-46.86)    | 10.98 (8.2-14.39)   | 9.44 (6.86-12.67)   |
| Anaphylaxis              | 35 - 54  | NA                  | NA                  | 76.59 (73.13-80.18) | 49.05 (45.34-52.97)  | NA                     | NA                     | 53.75 (52.44-55.08) | 38.81 (37.45-40.2)    | 83.16 (80.22-86.18)    | 40.56 (38.56-42.64)    | 12.92 (10.65-15.54) | 10.75 (8.71-13.13)  |
| Anaphylaxis              | 55 - 64  | NA                  | NA                  | 55.65 (51.35-60.21) | 42.55 (38.23-47.22)  | NA                     | NA                     | 43.02 (41.49-44.59) | 34.68 (33.1-36.31)    | 70.99 (67.41-74.71)    | 45.27 (42.4-48.27)     | 16.33 (12.37-21.16) | 13.39 (9.84-17.8)   |
| Anaphylaxis              | 65 - 74  | NA                  | NA                  | 33.06 (29.08-37.43) | 22.12 (17.89-27.04)  | 61.77 (55.84-68.16)    | 48.54 (42.94-54.68)    | 35.51 (33.85-37.23) | 26.47 (24.86-28.17)   | 49.34 (46.98-51.8)     | 39.23 (36.86-41.71)    | 10.71 (7.37-15.04)  | 13.75 (9.82-18.72)  |
| Anaphylaxis              | 75 - 84  | NA                  | NA                  | 20.64 (16.58-25.4)  | 17.38 (11.81-24.66)  | 48.11 (42.12-54.71)    | 30.4 (25.2-36.35)      | 21.74 (20-23.6)     | 22.13 (20.12-24.28)   | 35.87 (33.46-38.39)    | 31.19 (28.65-33.9)     | 8.71 (5.32-13.45)   | 13.69 (8.94-20.05)  |
| Anaphylaxis              | 85 - 114 | NA                  | NA                  | 15.64 (10.47-22.46) | 12.74 (4.67-27.73)   | 19.69 (14.61-25.96)    | 30.44 (22.37-40.48)    | 12.21 (10.38-14.27) | 8.14 (6.26-10.42)     | 24.22 (21.44-27.26)    | 16.86 (13.87-20.31)    | 4.21 (1.54-9.16)    | NA                  |
| Immune thrombocytopenia  | 1 - 5    | 12.19 (8.82-16.42)  | 16.09 (12.28-20.71) | 10.93 (9.23-12.85)  | 14.91 (12.96-17.07)  | NA                     | NA                     | 11.78 (9.96-13.83)  | 15.94 (13.91-18.2)    | 11.88 (8.84-15.62)     | 16.32 (12.82-20.49)    | 14 (7.45-23.93)     | 23.72 (15.2-35.29)  |
| Immune thrombocytopenia  | 6 - 17   | 6.66 (5.21-8.39)    | 3.95 (2.88-5.28)    | 9.16 (8.23-10.16)   | 8.27 (7.42-9.19)     | NA                     | NA                     | 13 (11.91-14.15)    | 12.39 (11.34-13.5)    | 9.62 (8.15-11.28)      | 9.28 (7.87-10.87)      | 5.77 (3.42-9.12)    | 8.15 (5.42-11.78)   |
| Immune thrombocytopenia  | 18 - 34  | 9 (7.3-10.96)       | 3.08 (2.3-4.05)     | 35.89 (33.79-38.08) | 18.57 (16.55-20.78)  | NA                     | NA                     | 28.99 (27.87-30.14) | 16.26 (15.2-17.37)    | 30.72 (28.55-33.01)    | 12.09 (10.79-13.5)     | 10.34 (7.65-13.67)  | 6.44 (4.34-9.19)    |
| Immune thrombocytopenia  | 35 - 54  | 11.61 (10.23-13.12) | 5.41 (4.58-6.35)    | 47.24 (44.53-50.08) | 43.54 (40.05-47.25)  | NA                     | NA                     | 32.07 (31.06-33.11) | 25.13 (24.04-26.26)   | 42.74 (40.64-44.92)    | 24.66 (23.1-26.29)     | 9.26 (7.36-11.52)   | 4.93 (3.58-6.61)    |
| Immune thrombocytopenia  | 55 - 64  | 14.68 (11.98-17.81) | 10.78 (8.85-13)     | 68.2 (63.43-73.24)  | 66.98 (61.54-72.78)  | NA                     | NA                     | 40.78 (39.28-42.31) | 43.01 (41.25-44.83)   | 59.62 (56.35-63.04)    | 59.49 (56.2-62.93)     | 10.32 (7.22-14.28)  | 5.98 (3.7-9.14)     |
| Immune thrombocytopenia  | 65 - 74  | 21.07 (15.12-28.58) | 15.79 (11.28-21.5)  | 73.07 (67.09-79.44) | 81.77 (73.44-90.79)  | 88.98 (81.83-96.6)     | 114.76 (106.04-124.01) | 51.23 (49.23-53.29) | 64.39 (61.85-67)      | 80.35 (77.32-83.48)    | 101.28 (97.45-105.22)  | 14.92 (10.93-19.91) | 15.47 (11.28-20.7)  |
| Immune thrombocytopenia  | 75 - 84  | NA                  | NA                  | 80.54 (72.29-89.48) | 91.43 (77.93-106.59) | 114.17 (104.82-124.12) | 189.55 (176.2-203.65)  | 63.41 (60.4-66.52)  | 94.18 (89.99-98.52)   | 100.42 (96.37-104.59)  | 146.68 (141.09-152.43) | 22.65 (16.92-29.7)  | 27.91 (20.9-36.5)   |
| Immune thrombocytopenia  | 85 - 114 | NA                  | NA                  | 78.25 (66.03-92.07) | 78.61 (55.35-108.36) | 122.2 (108.98-136.59)  | 220.67 (197.84-245.42) | 72.06 (67.51-76.84) | 109.95 (102.68-117.6) | 107.72 (101.77-113.94) | 174.36 (164.41-184.76) | 27.35 (19.45-37.39) | 32.82 (21.44-48.09) |
| Myocarditis pericarditis | 1 - 5    | 5.1 (3.02-8.06)     | 5.9 (3.7-8.93)      | 5.76 (4.55-7.2)     | 7.53 (6.16-9.1)      | NA                     | NA                     | 4.54 (3.43-5.88)    | 5.22 (4.08-6.57)      | 5.82 (3.77-8.59)       | 4.63 (2.87-7.08)       | NA                  | NA                  |

|                                        |          |                           |                           |                        |                        |                           |                           |                        |                        |                        |                           |                        |                          |
|----------------------------------------|----------|---------------------------|---------------------------|------------------------|------------------------|---------------------------|---------------------------|------------------------|------------------------|------------------------|---------------------------|------------------------|--------------------------|
| Myocarditis pericarditis               | 6 - 17   | 5.64<br>(4.32-7.25)       | 7.81 (6.27-9.61)          | 8.13 (7.26-9.08)       | 11.6 (10.59-12.67)     | NA                        | NA                        | 6.39 (5.64-7.21)       | 9.92 (8.99-10.93)      | 5.89 (4.75-7.21)       | 10.19 (8.7-11.85)         | 4.49<br>(2.45-7.53)    | 11.64 (8.32-15.85)       |
| Myocarditis pericarditis               | 18 - 34  | 4.04<br>(2.93-5.42)       | 7.86 (6.57-9.33)          | 28.31<br>(26.45-30.26) | 55.44<br>(51.89-59.16) | NA                        | NA                        | 22.89<br>(21.89-23.91) | 52.8 (50.88-54.77)     | 20.88<br>(19.09-22.78) | 37.8 (35.48-40.24)        | 14.35<br>(11.15-18.2)  | 61.83 (54.9-69.4)        |
| Myocarditis pericarditis               | 35 - 54  | 5.83<br>(4.86-6.93)       | 8.78 (7.72-9.95)          | 56.55<br>(53.58-59.65) | 74.76<br>(70.17-79.57) | NA                        | NA                        | 33.15<br>(32.12-34.2)  | 50.33<br>(48.78-51.91) | 40.2 (38.16-42.32)     | 48.19<br>(46.01-50.45)    | 20.82<br>(17.9-24.07)  | 50.3 (45.76-55.18)       |
| Myocarditis pericarditis               | 55 - 64  | 6.56<br>(4.8-8.74)        | 12.06<br>(10.02-14.41)    | 66.22<br>(61.52-71.19) | 84.92<br>(78.77-91.42) | NA                        | NA                        | 41.99<br>(40.48-43.55) | 60.21<br>(58.12-62.35) | 67.04<br>(63.56-70.65) | 84.74 (80.8-88.82)        | 37.83<br>(31.65-44.86) | 65.84<br>(57.62-74.9)    |
| Myocarditis pericarditis               | 65 - 74  | 11.82<br>(7.49-17.73)     | 17.36<br>(12.62-23.31)    | 62.31<br>(56.79-68.21) | 73.62<br>(65.72-82.2)  | 81.48<br>(74.64-88.78)    | 115.12<br>(106.38-124.38) | 46.16<br>(44.27-48.12) | 66.25<br>(63.67-68.9)  | 76.4 (73.45-79.45)     | 100.47<br>(96.66-104.4)   | 49.33<br>(41.8-57.83)  | 85.64<br>(75.33-96.96)   |
| Myocarditis pericarditis               | 75 - 84  | NA                        | NA                        | 55.47<br>(48.66-62.96) | 67.3 (55.79-80.47)     | 100.25<br>(91.51-109.6)   | 149.65<br>(137.81-162.22) | 51.42<br>(48.71-54.23) | 72.42<br>(68.76-76.24) | 91.23<br>(87.38-95.21) | 117.96<br>(112.95-123.13) | 61.88<br>(52.12-72.93) | 101.17<br>(87.36-116.53) |
| Myocarditis pericarditis               | 85 - 114 | NA                        | NA                        | 61.51<br>(50.74-73.89) | 57.35 (37.8-83.45)     | 116.27<br>(103.38-130.32) | 133.59<br>(115.97-153.13) | 46.38<br>(42.74-50.24) | 52.49<br>(47.51-57.85) | 96.61<br>(90.97-102.5) | 122.28<br>(113.97-131.03) | 42.78<br>(32.73-54.96) | 80.83<br>(62.25-103.22)  |
| Disseminated intravascular coagulation | 1 - 5    | 24.67<br>(19.76-30.43)    | 31.65<br>(26.19-37.9)     | 2.69 (1.89-3.73)       | 3.91 (2.94-5.08)       | NA                        | NA                        | 1.75 (1.1-2.65)        | 1.45 (0.89-2.24)       | 1.63 (0.66-3.36)       | 1.32 (0.49-2.88)          | NA                     | NA                       |
| Disseminated intravascular coagulation | 6 - 17   | 17.58<br>(15.17-20.27)    | 18.25<br>(15.85-20.91)    | 2.92 (2.41-3.51)       | 2.87 (2.38-3.43)       | NA                        | NA                        | 1.23 (0.91-1.62)       | 1.53 (1.18-1.95)       | 1.58 (1.02-2.34)       | 1.94 (1.33-2.74)          | NA                     | NA                       |
| Disseminated intravascular coagulation | 18 - 34  | 61.91<br>(57.32-66.76)    | 17.23<br>(15.29-19.35)    | 14.92<br>(13.58-16.36) | 12.91<br>(11.23-14.77) | NA                        | NA                        | 5.34 (4.86-5.85)       | 4.43 (3.89-5.03)       | 6.12 (5.17-7.19)       | 3.76 (3.05-4.58)          | NA                     | 1.5 (0.6-3.09)           |
| Disseminated intravascular coagulation | 35 - 54  | 54.33<br>(51.29-57.5)     | 31.23<br>(29.19-33.37)    | 24.32<br>(22.39-26.38) | 35.51<br>(32.36-38.87) | NA                        | NA                        | 5.93 (5.5-6.38)        | 7 (6.43-7.6)           | 9.54 (8.56-10.6)       | 7.09 (6.26-7.98)          | 2.74<br>(1.76-4.08)    | 3.47 (2.36-4.93)         |
| Disseminated intravascular coagulation | 55 - 64  | 64.74<br>(58.92-70.98)    | 83.41<br>(77.87-89.24)    | 46.74<br>(42.81-50.94) | 56.26<br>(51.28-61.6)  | NA                        | NA                        | 8.44 (7.77-9.15)       | 12.34 (11.4-13.33)     | 21.21<br>(19.28-23.29) | 22.2 (20.2-24.33)         | 4.3 (2.41-7.09)        | 6.84 (4.38-10.17)        |
| Disseminated intravascular coagulation | 65 - 74  | 111.58<br>(97.23-127.46)  | 167.12<br>(151.57-183.83) | 41.3 (36.84-46.15)     | 58.45<br>(51.44-66.15) | 21.22 (17.8-25.1)         | 32.07<br>(27.54-37.13)    | 11.85 (10.9-12.86)     | 15.13<br>(13.91-16.42) | 29.65<br>(27.82-31.57) | 41.07<br>(38.65-43.61)    | 4.54<br>(2.48-7.62)    | 7.22 (4.47-11.03)        |
| Disseminated intravascular coagulation | 75 - 84  | 157.98<br>(136.78-325.49) | 250.18<br>(136.78-419.76) | 43.85<br>(37.82-50.56) | 56.62<br>(46.12-68.8)  | 37.33<br>(32.08-43.2)     | 48.9 (42.25-56.31)        | 15.09<br>(13.64-16.65) | 18.56<br>(16.72-20.53) | 39.55<br>(37.03-42.2)  | 53.43<br>(50.08-56.94)    | 10.45<br>(6.7-15.55)   | 11.58 (7.26-17.54)       |
| Disseminated intravascular coagulation | 85 - 114 | NA                        | NA                        | 39.91<br>(31.34-50.11) | 42.47<br>(25.94-65.59) | 43.72<br>(35.96-52.65)    | 66.74<br>(54.48-80.95)    | 14.22<br>(12.24-16.43) | 21.33 (18.2-24.84)     | 35.41<br>(32.03-39.05) | 54.25<br>(48.77-60.18)    | 3.51<br>(1.14-8.18)    | 7.57 (2.78-16.48)        |



|                   |          |                        |                        |                        |                        |                        |                        |                  |                    |                        |                        |                      |                   |
|-------------------|----------|------------------------|------------------------|------------------------|------------------------|------------------------|------------------------|------------------|--------------------|------------------------|------------------------|----------------------|-------------------|
| Encephalomyelitis | 1 - 5    | 8.5<br>(5.74-12.14)    | 6.97 (4.55-10.21)      | 5.46 (4.28-6.87)       | 5.61 (4.44-6.99)       | NA                     | NA                     | 2.86 (2.01-3.97) | 3.33 (2.44-4.45)   | 7.92 (5.48-11.06)      | 4.41 (2.69-6.81)       | NA                   | NA                |
| Encephalomyelitis | 6 - 17   | 3.7<br>(2.64-5.04)     | 4.39 (3.26-5.78)       | 5.7 (4.97-6.5)         | 5.09 (4.43-5.82)       | NA                     | NA                     | 2.83 (2.33-3.39) | 3.3 (2.77-3.9)     | 5.89 (4.75-7.21)       | 5.21 (4.17-6.44)       | 1.6 (0.52-3.74)      | 2.33 (1.01-4.59)  |
| Encephalomyelitis | 18 - 34  | 5.97<br>(4.6-7.6)      | 3.57 (2.72-4.6)        | 8.99 (7.95-10.12)      | 10.17 (8.68-11.83)     | NA                     | NA                     | 3.25 (2.88-3.65) | 3.9 (3.39-4.46)    | 4.22 (3.44-5.12)       | 4.68 (3.89-5.59)       | 4.01<br>(2.41-6.26)  | 3.43 (1.96-5.58)  |
| Encephalomyelitis | 35 - 54  | 3.96<br>(3.17-4.88)    | 4.09 (3.37-4.91)       | 19.11 (17.4-20.94)     | 24.9 (22.28-27.75)     | NA                     | NA                     | 3.65 (3.31-4.01) | 4.84 (4.37-5.35)   | 7.75 (6.87-8.71)       | 7.06 (6.24-7.96)       | 3.55<br>(2.41-5.03)  | 4.81 (3.48-6.49)  |
| Encephalomyelitis | 55 - 64  | 5.56<br>(3.95-7.6)     | 7.71 (6.1-9.63)        | 28.28<br>(25.23-31.58) | 29.69 (26.1-33.63)     | NA                     | NA                     | 5.26 (4.73-5.83) | 6.92 (6.22-7.67)   | 15.97 (14.3-17.78)     | 17.27<br>(15.52-19.16) | 4.3 (2.41-7.09)      | 6.84 (4.38-10.17) |
| Encephalomyelitis | 65 - 74  | 4.62<br>(2.11-8.78)    | 9.47 (6.07-14.09)      | 24.43<br>(21.03-28.23) | 30.73<br>(25.71-36.45) | 14.51<br>(11.71-17.77) | 20.78<br>(17.17-24.92) | 5.98 (5.31-6.71) | 8.32 (7.42-9.29)   | 20.39<br>(18.88-22)    | 25.08<br>(23.19-27.08) | 7.14<br>(4.47-10.81) | 9.62 (6.39-13.91) |
| Encephalomyelitis | 75 - 84  | NA                     | NA                     | 19.72<br>(15.75-24.38) | 26.35<br>(19.36-35.03) | 19.7 (15.94-24.08)     | 36.73 (31-43.22)       | 6.96 (5.99-8.04) | 10.17 (8.83-11.66) | 24.79 (22.8-26.91)     | 30.86<br>(28.33-33.55) | 4.79<br>(2.39-8.57)  | 6.32 (3.26-11.03) |
| Encephalomyelitis | 85 - 114 | NA                     | NA                     | 22.65<br>(16.32-30.62) | 21.23<br>(10.18-39.05) | 29.53<br>(23.23-37.02) | 36.28 (27.4-47.11)     | 6.8 (5.45-8.38)  | 7.11 (5.35-9.25)   | 23.43 (20.7-26.42)     | 34.34<br>(30.01-39.12) | 4.91<br>(1.97-10.11) | NA                |
| Narcolepsy        | 1 - 5    | 2.27<br>(0.98-4.47)    | 3.22 (1.66-5.62)       | 0.97 (0.52-1.66)       | 1.56 (0.98-2.36)       | NA                     | NA                     | NA               | NA                 | NA                     | NA                     | NA                   | NA                |
| Narcolepsy        | 6 - 17   | 10.36<br>(8.53-12.47)  | 10.09<br>(8.33-12.11)  | 13.26<br>(12.15-14.46) | 14.06<br>(12.94-15.24) | NA                     | NA                     | NA               | NA                 | 9.68 (8.21-11.34)      | 8.37 (7.03-9.89)       | NA                   | NA                |
| Narcolepsy        | 18 - 34  | 21.67<br>(18.99-24.62) | 16.45<br>(14.55-18.52) | 46.49 (44.1-48.97)     | 33.01<br>(30.29-35.91) | NA                     | NA                     | NA               | NA                 | 52.97<br>(50.11-55.95) | 29.93<br>(27.87-32.11) | 1.27<br>(0.46-2.76)  | 1.93 (0.88-3.67)  |
| Narcolepsy        | 35 - 54  | 6.6<br>(5.57-7.77)     | 9.21 (8.12-10.41)      | 91.82<br>(88.02-95.74) | 56.65<br>(52.66-60.86) | NA                     | NA                     | NA               | NA                 | 57.67<br>(55.22-60.19) | 32.64<br>(30.85-34.51) | 2.06<br>(1.22-3.25)  | 2.24 (1.37-3.46)  |
| Narcolepsy        | 55 - 64  | 4.42 (3-6.27)          | 7.71 (6.1-9.63)        | 61.36<br>(56.83-66.14) | 39.8 (35.62-44.32)     | NA                     | NA                     | NA               | NA                 | 53.61 (50.5-56.85)     | 36.6 (34.02-39.31)     | 1.72<br>(0.63-3.74)  | 4.27 (2.39-7.05)  |
| Narcolepsy        | 65 - 74  | 6.68<br>(3.56-11.42)   | 8.68 (5.44-13.14)      | 42.5 (37.97-47.43)     | 30.97<br>(25.93-36.71) | 37.76<br>(33.15-42.83) | 40.5 (35.39-46.14)     | NA               | NA                 | 38.01<br>(35.93-40.17) | 34.71<br>(32.49-37.05) | NA                   | NA                |
| Narcolepsy        | 75 - 84  | NA                     | NA                     | 25.98 (21.4-31.27)     | 26.91<br>(19.84-35.68) | 32.57<br>(27.67-38.08) | 41.56<br>(35.44-48.43) | NA               | NA                 | 27.57<br>(25.47-29.79) | 33.8 (31.14-36.62)     | 2.18<br>(0.71-5.08)  | NA                |

|                         |          |                  |                  |                    |                     |                    |                     |                  |                  |                     |                     |                   |                     |
|-------------------------|----------|------------------|------------------|--------------------|---------------------|--------------------|---------------------|------------------|------------------|---------------------|---------------------|-------------------|---------------------|
| Narcolepsy              | 85 - 114 | NA               | NA               | 20.5 (14.5-28.13)  | 23.36 (11.66-41.79) | 25.6 (19.76-32.63) | 32.39 (24.04-42.71) | NA               | NA               | 19.55 (17.07-22.3)  | 28.42 (24.49-32.79) | NA                | NA                  |
| Guillain-Barre syndrome | 1 - 5    | 1.42 (0.46-3.31) | 2.68 (1.29-4.93) | 0.97 (0.52-1.66)   | 0.92 (0.49-1.58)    | NA                 | NA                  | NA               | 0.65 (0.3-1.24)  | 1.86 (0.8-3.67)     | 1.1 (0.36-2.57)     | 5.38 (1.75-12.56) | NA                  |
| Guillain-Barre syndrome | 6 - 17   | 0.74 (0.32-1.46) | 1.67 (1-2.6)     | 0.62 (0.39-0.92)   | 0.88 (0.62-1.22)    | NA                 | NA                  | 0.57 (0.36-0.85) | 0.67 (0.44-0.97) | 1.08 (0.63-1.72)    | 1.27 (0.79-1.95)    | 1.92 (0.71-4.19)  | 2.04 (0.82-4.2)     |
| Guillain-Barre syndrome | 18 - 34  | 3.03 (2.09-4.25) | 2.24 (1.57-3.08) | 3.57 (2.94-4.31)   | 2.56 (1.84-3.46)    | NA                 | NA                  | 2.03 (1.74-2.35) | 1.92 (1.57-2.33) | 3.35 (2.66-4.16)    | 1.99 (1.49-2.62)    | 1.9 (0.87-3.61)   | 3.22 (1.8-5.31)     |
| Guillain-Barre syndrome | 35 - 54  | 2.05 (1.49-2.74) | 4.09 (3.37-4.91) | 7.84 (6.76-9.05)   | 6.13 (4.87-7.62)    | NA                 | NA                  | 2.73 (2.44-3.05) | 3.25 (2.86-3.67) | 4.27 (3.63-5)       | 3.79 (3.2-4.47)     | 1.94 (1.13-3.11)  | 4.37 (3.11-5.97)    |
| Guillain-Barre syndrome | 55 - 64  | 3.56 (2.31-5.26) | 4.85 (3.58-6.41) | 10.18 (8.39-12.23) | 9.38 (7.41-11.7)    | NA                 | NA                  | 3.18 (2.77-3.63) | 5.29 (4.68-5.95) | 7.84 (6.68-9.14)    | 8.63 (7.41-10)      | 2.01 (0.81-4.13)  | 7.41 (4.84-10.85)   |
| Guillain-Barre syndrome | 65 - 74  | 3.08 (1.13-6.71) | 5.92 (3.31-9.76) | 7.57 (5.73-9.81)   | 8.15 (5.68-11.33)   | 9.98 (7.69-12.75)  | 11.29 (8.67-14.44)  | 4.07 (3.53-4.69) | 5.69 (4.95-6.5)  | 8.68 (7.7-9.75)     | 12.46 (11.14-13.89) | 6.81 (4.22-10.41) | 11.69 (8.09-16.33)  |
| Guillain-Barre syndrome | 75 - 84  | NA               | NA               | 4.64 (2.83-7.16)   | 12.33 (7.73-18.67)  | 7.05 (4.88-9.85)   | 17.99 (14.05-22.69) | 5.17 (4.34-6.12) | 6.9 (5.8-8.14)   | 9.22 (8.02-10.54)   | 15.01 (13.26-16.92) | 6.53 (3.66-10.78) | 15.27 (10.23-21.93) |
| Guillain-Barre syndrome | 85 - 114 | NA               | NA               | 5.93 (2.96-10.61)  | NA                  | 13 (8.95-18.25)    | 23.32 (16.33-32.29) | 4.87 (3.74-6.23) | 7.11 (5.35-9.25) | 8.37 (6.77-10.23)   | 19.14 (15.95-22.79) | 4.21 (1.54-9.16)  | 13.88 (6.93-24.84)  |
| Transverse myelitis     | 1 - 5    | NA               | NA               | 0.67 (0.31-1.28)   | 1.14 (0.65-1.84)    | NA                 | NA                  | 0.72 (0.33-1.36) | 0.43 (0.16-0.95) | 1.16 (0.38-2.72)    | NA                  | NA                | NA                  |
| Transverse myelitis     | 6 - 17   | NA               | NA               | 1.21 (0.89-1.6)    | 1.05 (0.76-1.41)    | NA                 | NA                  | 1.2 (0.89-1.59)  | 1.27 (0.95-1.66) | 1.01 (0.58-1.64)    | 0.85 (0.46-1.42)    | NA                | NA                  |
| Transverse myelitis     | 18 - 34  | NA               | NA               | 5.21 (4.44-6.09)   | 3.9 (3-4.98)        | NA                 | NA                  | 4.64 (4.2-5.11)  | 3.34 (2.87-3.87) | 4.22 (3.44-5.12)    | 2.8 (2.2-3.52)      | 1.27 (0.46-2.76)  | NA                  |
| Transverse myelitis     | 35 - 54  | 0.36 (0.16-0.72) | 0.36 (0.17-0.66) | 12.1 (10.75-13.57) | 9.01 (7.46-10.78)   | NA                 | NA                  | 8.37 (7.86-8.9)  | 6.27 (5.73-6.84) | 11.52 (10.44-12.68) | 5.29 (4.59-6.08)    | 2.52 (1.58-3.81)  | 1.01 (0.46-1.91)    |
| Transverse myelitis     | 55 - 64  | NA               | NA               | 10.54 (8.71-12.63) | 7.81 (6.03-9.96)    | NA                 | NA                  | 7.2 (6.58-7.86)  | 7.11 (6.4-7.87)  | 11.5 (10.08-13.05)  | 8.68 (7.45-10.06)   | 1.43 (0.47-3.34)  | 1.42 (0.46-3.32)    |
| Transverse myelitis     | 65 - 74  | NA               | NA               | 6.9 (5.16-9.05)    | 5.12 (3.21-7.75)    | 11.39 (8.93-14.32) | 6.99 (4.97-9.55)    | 6.76 (6.05-7.54) | 5.34 (4.63-6.13) | 8.77 (7.79-9.84)    | 7.21 (6.22-8.32)    | NA                | NA                  |
| Transverse myelitis     | 75 - 84  | NA               | NA               | 4.87 (3.02-7.45)   | 4.48 (1.94-8.84)    | 8.5 (6.1-11.53)    | 8.87 (6.18-12.33)   | 5.17 (4.34-6.12) | 4.42 (3.55-5.43) | 6.66 (5.65-7.8)     | 6.04 (4.95-7.29)    | NA                | NA                  |

|                        |             |    |    |    |    |                      |                       |                      |                     |                     |                    |    |    |
|------------------------|-------------|----|----|----|----|----------------------|-----------------------|----------------------|---------------------|---------------------|--------------------|----|----|
| Transverse<br>myelitis | 85 -<br>114 | NA | NA | NA | NA | 4.33 (2.16-<br>7.75) | 6.48 (3.11-<br>11.91) | 2.16 (1.44-<br>3.13) | 2.84 (1.78-<br>4.3) | 4.4 (3.27-<br>5.81) | 5.32 (3.7-<br>7.4) | NA | NA |
|------------------------|-------------|----|----|----|----|----------------------|-----------------------|----------------------|---------------------|---------------------|--------------------|----|----|

**Appendix Figure 1: database-specific incidence rates and meta-analytic pooled rates with 95% prediction intervals**

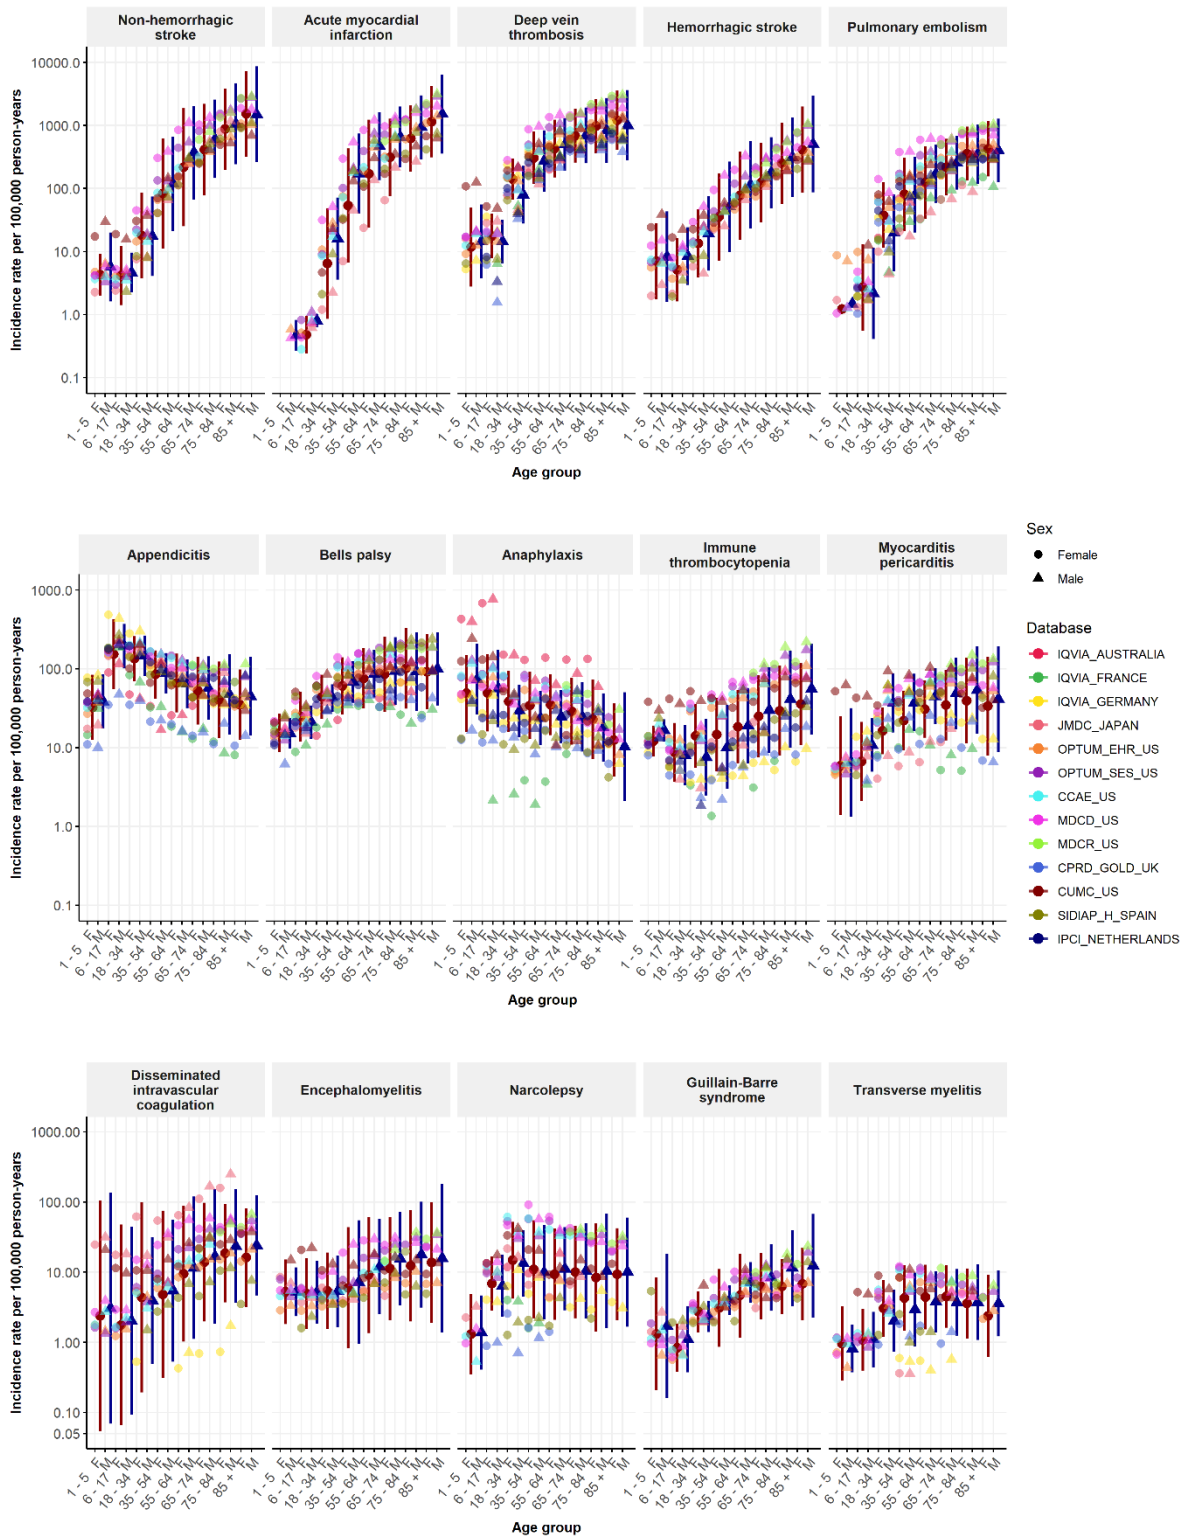

Supplement: lix065802.ww.pdf [file lix065802.ww.pdf]
